# Supplementary material
Source: PubMed Central journal article supplement (PMC4746331)
Supplement: mmc1.pdf [file mmc1.pdf]

The American Journal of Human Genetics

Supplemental Data

# **Genome-wide Association Study of Platelet Count Identifies Ancestry-Specific Loci in Hispanic/Latino Americans**

**Ursula M. Schick, Deepti Jain, Chani J. Hodonsky, Jean V. Morrison, James P. Davis,  
Lisa Brown, Tamar Sofer, Matthew P. Conomos, Claudia Schurmann, Caitlin P.  
McHugh, Sarah C. Nelson, Swarooparani Vadlamudi, Adrienne Stilp, Anna Plantinga,  
Leslie Baier, Stephanie A. Bien, Stephanie M. Gogarten, Cecelia A. Laurie, Kent D.  
Taylor, Yongmei Liu, Paul L. Auer Nora Franceschini, Adam Szpiro, Ken Rice, Kathleen  
F. Kerr, Jerome I. Rotter, Robert L. Hanson, George Papanicolaou, Stephen S. Rich,  
Ruth J.F. Loos, Brian L. Browning, Sharon R. Browning, Bruce S. Weir, Cathy C. Laurie,  
Karen L. Mohlke, Kari E. North, Timothy A. Thornton, and Alex P. Reiner**

**A.**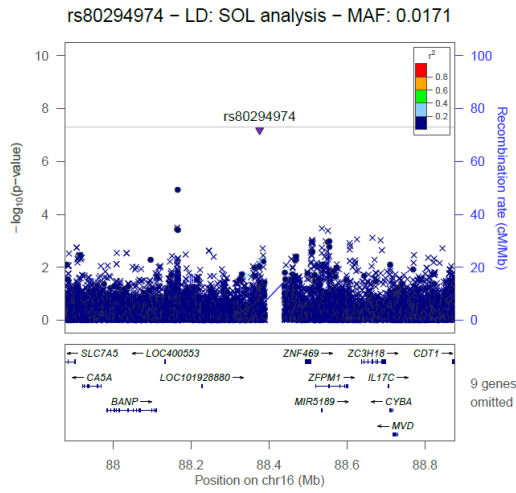**B.**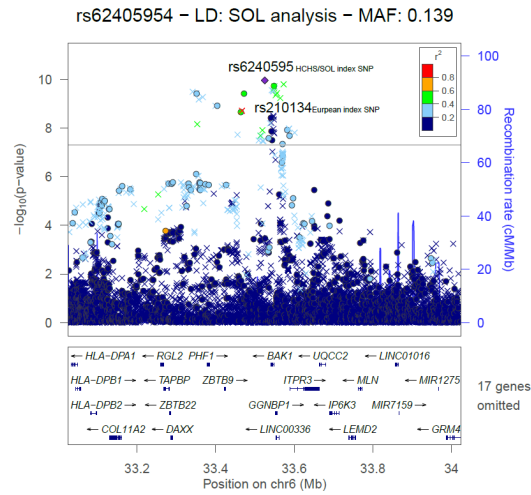**C.**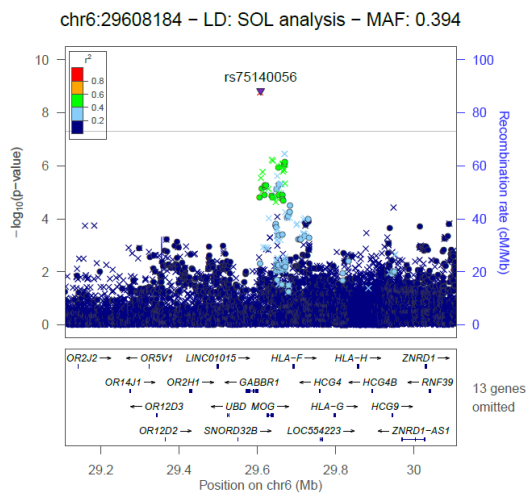**D.**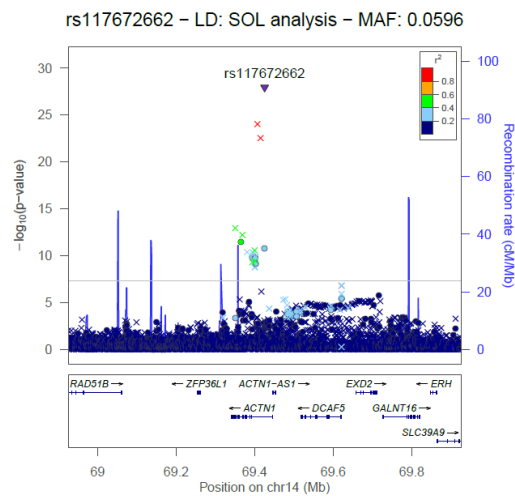**E.**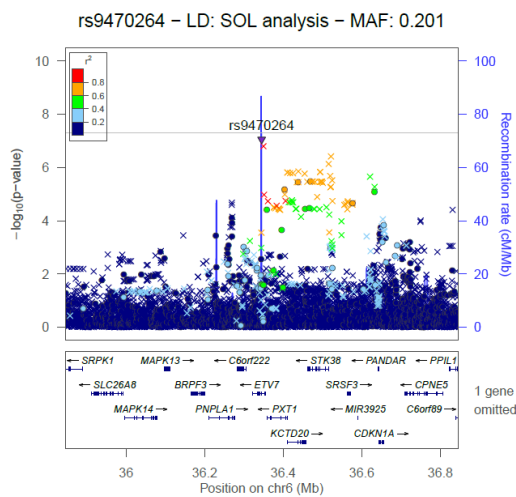**F.**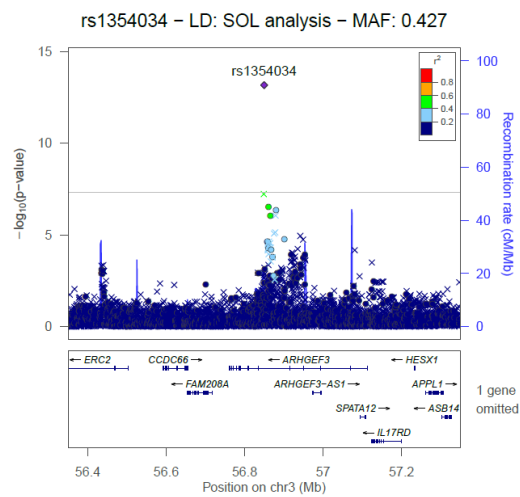

**G.**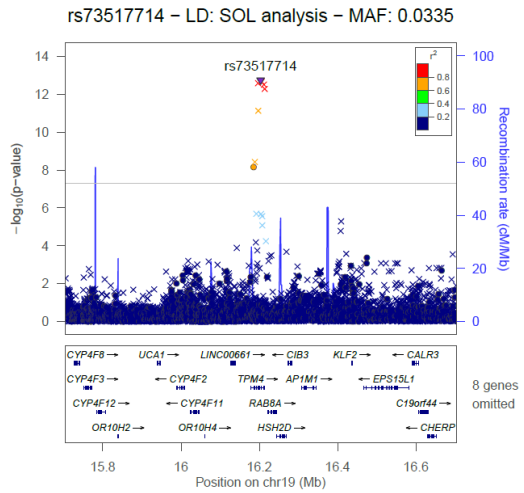**H.**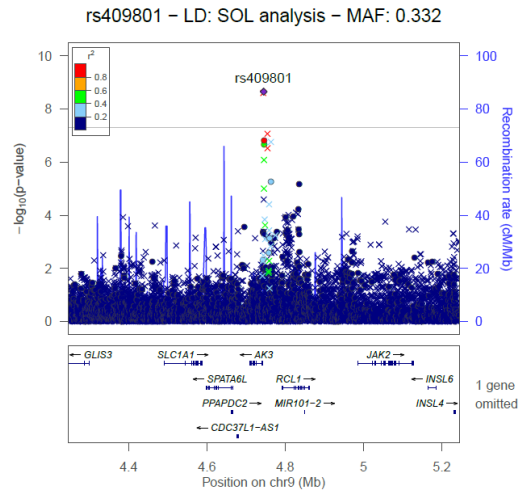**I.**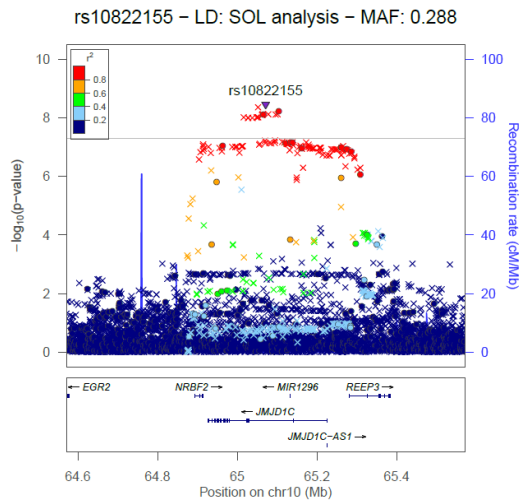**J.**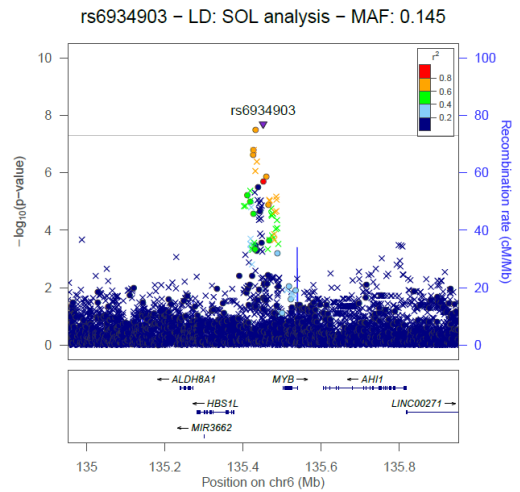**K.**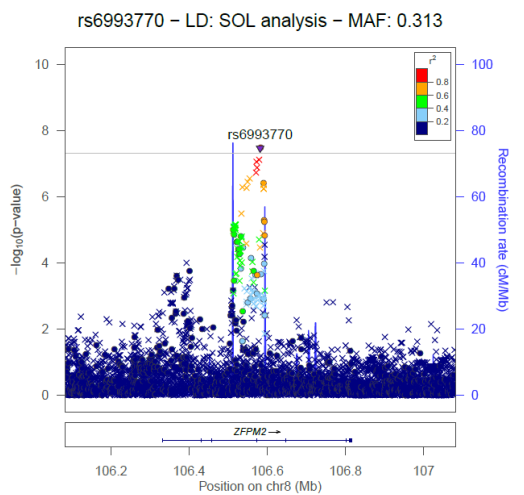**L.**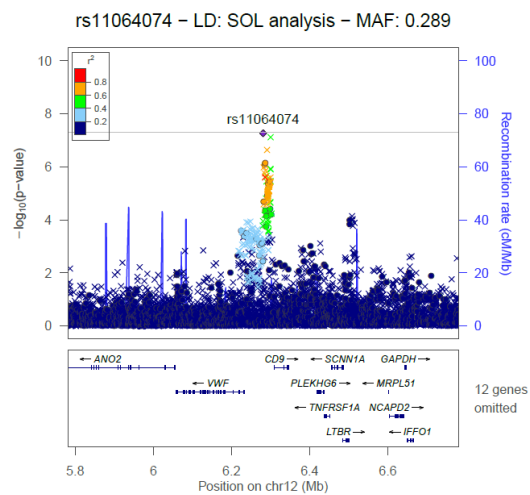

**Figure S1:** LocusZoom plots of loci that have discovery p-values less than  $1 \times 10^{-7}$ . In each, the top panel reflects the main PLT GWAS analysis results. The LD estimates were calculated in the SOL discovery sample and are presented with respect to the lowest P-value SNP (reference). The genotyped reference SNP is denoted by a filled diamond, imputed reference SNP is denoted by a filled triangle, other imputed SNPs are denoted by a cross, and other genotyped SNPs are denoted by a filled circle. Recombination hotspots are indicated by the blue lines and scaled according to the y-axis on the right side of the plot. The dashed line indicates the nominal significance threshold  $p\text{-value} \leq 5 \times 10^{-8}$ . The bottom panel shows the genes and their orientation for each region. A. *BANP-ZFPMI* with rs80294974 as index variant, B. *ZBTB9-BAK1* with rs62405954 as index variant, C. *GABBR1-MOG* with rs75140056 as index variant, D. *ACTN1* with rs117672662 as index variant, E. *ETV7* with rs9470264 as index variant, F. *ARGHEF3* with rs1354034 as index variant, G. *TPM4* with rs73517714 as index variant, H. *AK3-RCL1* with rs409801 as index variant, I. *JMJD1C* with rs10822155 as index variant, J. *HBSIL-MYB* with rs6934903 as index variants, K. *ZFPM2* with rs6993770 as index variant, L. *VWF-CD9* with rs11064074 as index variant.

**A.**

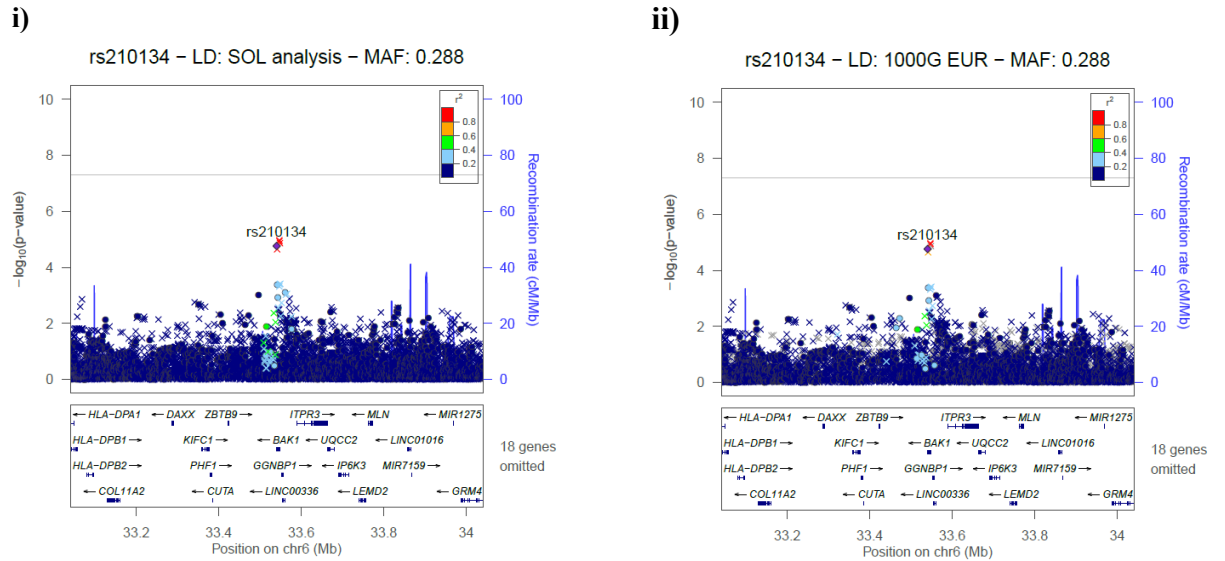

**B.**

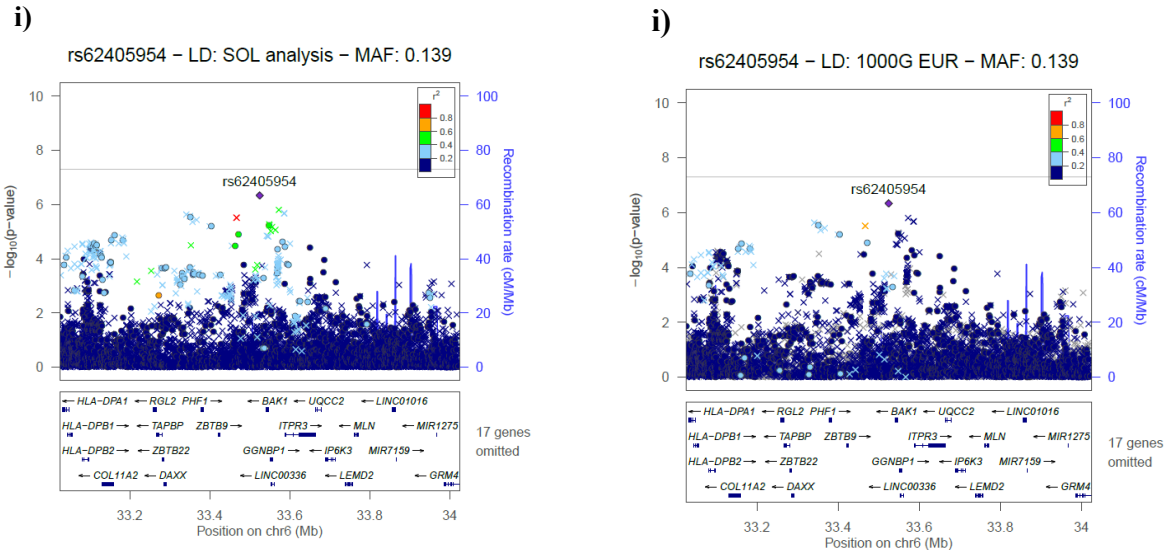

**Figure S2. LocusZoom plots of conditional analysis at *ZBTB9-BAK1* locus.** In each, the top panel reflects the conditional analysis results. The LD estimates with respect to the indicated reference SNP at each locus are color coded based on the scale indicated in each plot. As indicated, the LD estimates are either derived using HCHS/SOL population or the 1000 genomes EUR super-population. The genotyped reference SNP is denoted by a filled diamond, imputed reference SNP is denoted by a filled triangle, other imputed SNPs are denoted by a cross, and other genotyped SNPs are denoted by a filled circle. Recombination hotspots are indicated by the blue lines. The dashed line indicates the nominal significance threshold  $p\text{-value} \leq 5 \times 10^{-8}$ . The bottom panel shows the genes and their orientation for each region. **A.** Conditioned on HCHS/SOL index SNP rs62405954 and color coded by i) LD estimates from HCHS/SOL population, and ii) LD estimates from 1000genomes EUR super-population. **B.** Conditioned on the European GWAS index SNP rs210134 and color coded by i) LD estimates from HCHS/SOL population, and ii) LD estimates from 1000genomes EUR super-population.

A.

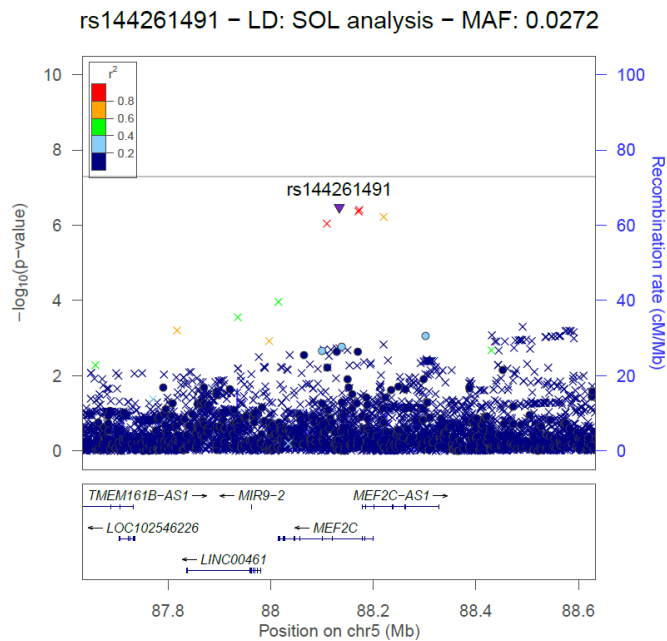

B.

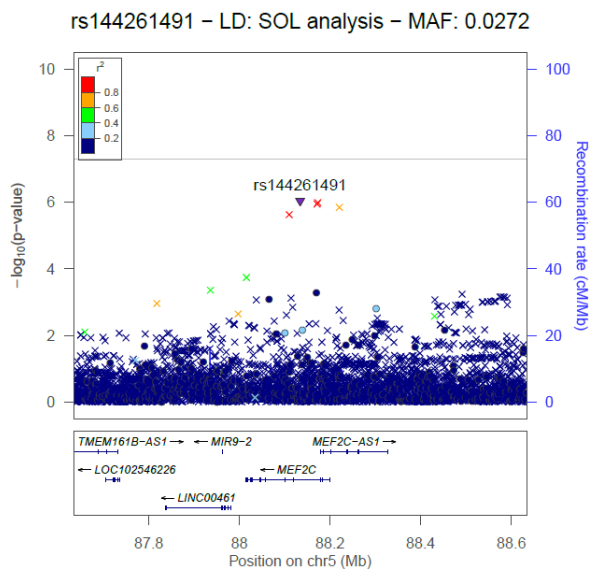

C.

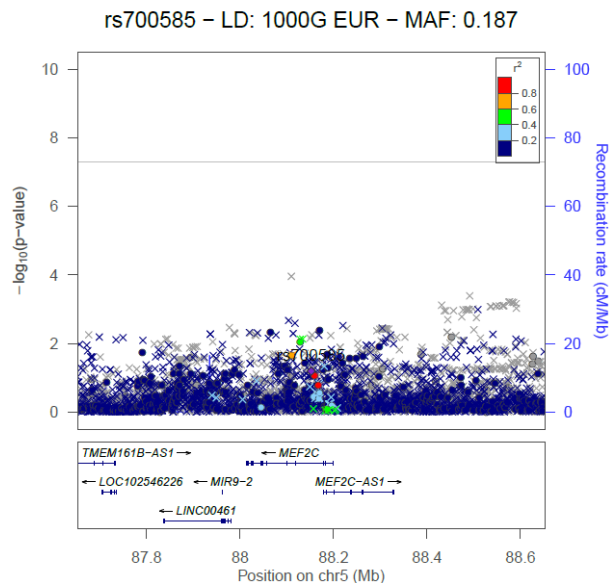

**Figure S3. LocusZoom plots of main and conditional analysis at *MEF2C* locus.** In each, the top panel reflects the main PLT GWAS or conditional analysis results, as indicated. The LD estimates with respect to the indicated reference SNP at each locus are color coded based on the scale indicated in each plot. As noted, the LD estimates are either derived using HCHS/SOL population or the 1000 genomes EUR super-population. The genotyped reference SNP is denoted by a filled diamond, imputed reference SNP is denoted by a filled triangle, other imputed SNPs are denoted by a cross and other genotyped SNPs are denoted by a filled circle. Recombination hotspots are indicated by the blue lines. The dashed line indicates the nominal significance threshold  $p\text{-value} \leq 5 \times 10^{-8}$ . The bottom panel shows the genes and their orientation for each region. **A.** *MEF2C* locus from the main PLT GWAS analysis color coded by LD estimates from HCHS/SOL with reference to HCHS/SOL index SNP rs144261491. **B.** *MEF2C* locus conditioned on European GWAS index SNP rs700585 and color coded by LD estimates from HCHS/SOL population. **C.** *MEF2C* locus conditioned on HCHS/SOL index SNP rs144261491 and color coded LD estimates from 1000 genomes EUR super-population

A.

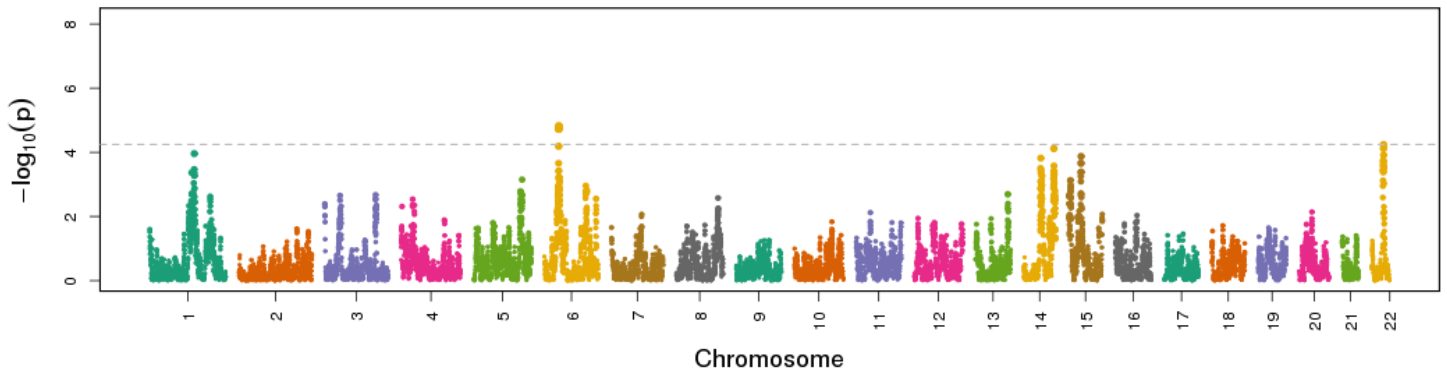

B.

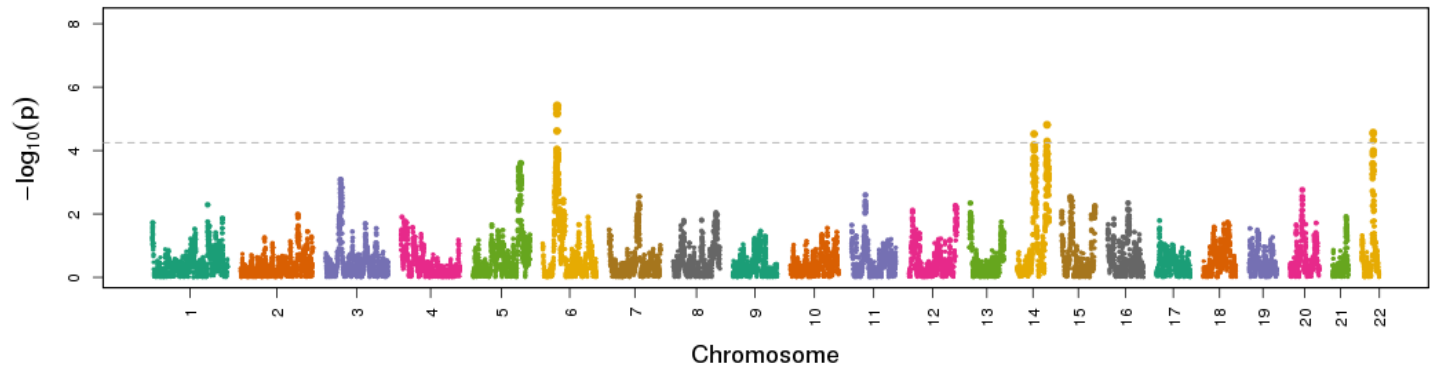

**Figure S4:** A. Genome-wide admixture scan with a joint test of all three local ancestry estimates (Amerindian, European, African) from RFMix with dashed line indicating the significance threshold  $p\text{-value} \leq -\log_{10}(5.7 \times 10^{-5})$ , B. Genome-wide admixture scan of Amerindian against any other ancestry from RFMix with dashed line indicating the significance threshold  $p\text{-value} \leq -\log_{10}(5.7 \times 10^{-5})$ .

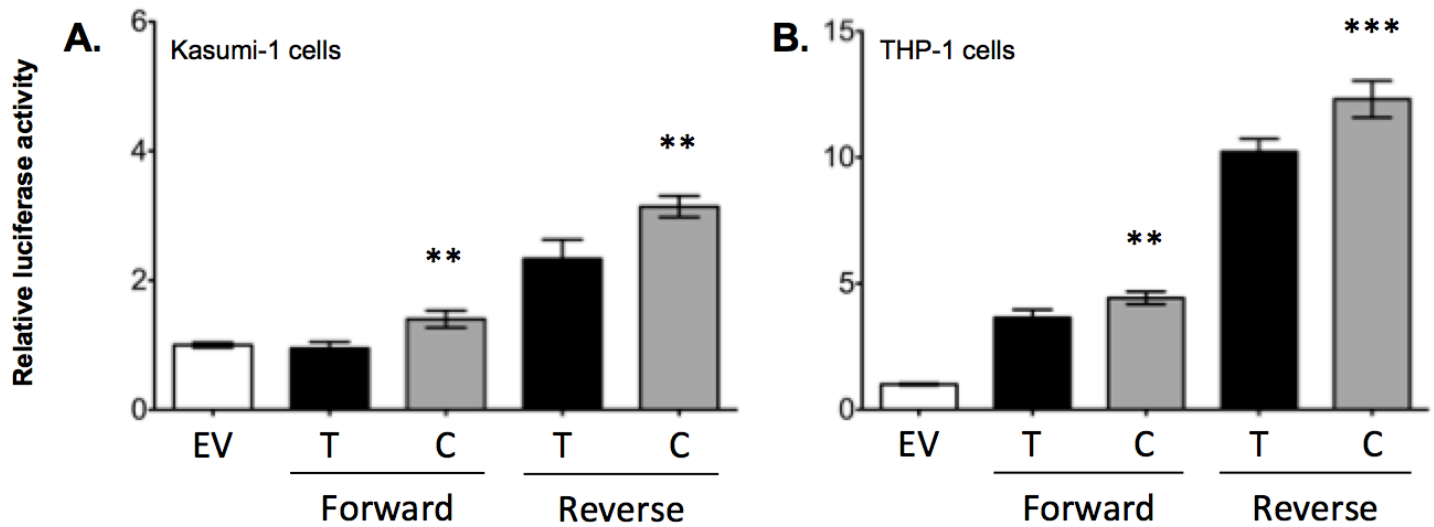

**Figure S5: Allelic differences in transcriptional activity of variant rs117672662.** A 186 bp PCR product approximately centered on rs117672662 was cloned in both orientations (Forward and Reverse) relative to a minimal promoter in a transcriptional reporter vector (pGL4.23). Clones were transfected into (A) Kasumi-1 cells: a myeloblast, cell line established from the peripheral blood of an acute myeloid leukemia patient and (B) THP-1 cells: a monocyte cell line, isolated from peripheral blood of an acute monocyte leukemia patient. The cells were incubated for 48 hrs, and luciferase and Renilla activity were measured in the cell lysate. Results are shown as relative luciferase/Renilla activity normalized to empty vector. Error bars represent the standard deviation of results for four clones. EV: Empty Vector



|             |   |   |   |   |   |   |   |   |
|-------------|---|---|---|---|---|---|---|---|
| rs117672662 | T | T | T | T | C | C | C | C |
| THP1 NE     | + | + | + | + | + | + | + | + |
| Competition |   | T | C |   |   | C | T |   |
| GATA1 Ab    |   |   |   | + |   |   |   | + |
| Lane        | 1 | 2 | 3 | 4 | 5 | 6 | 7 | 8 |

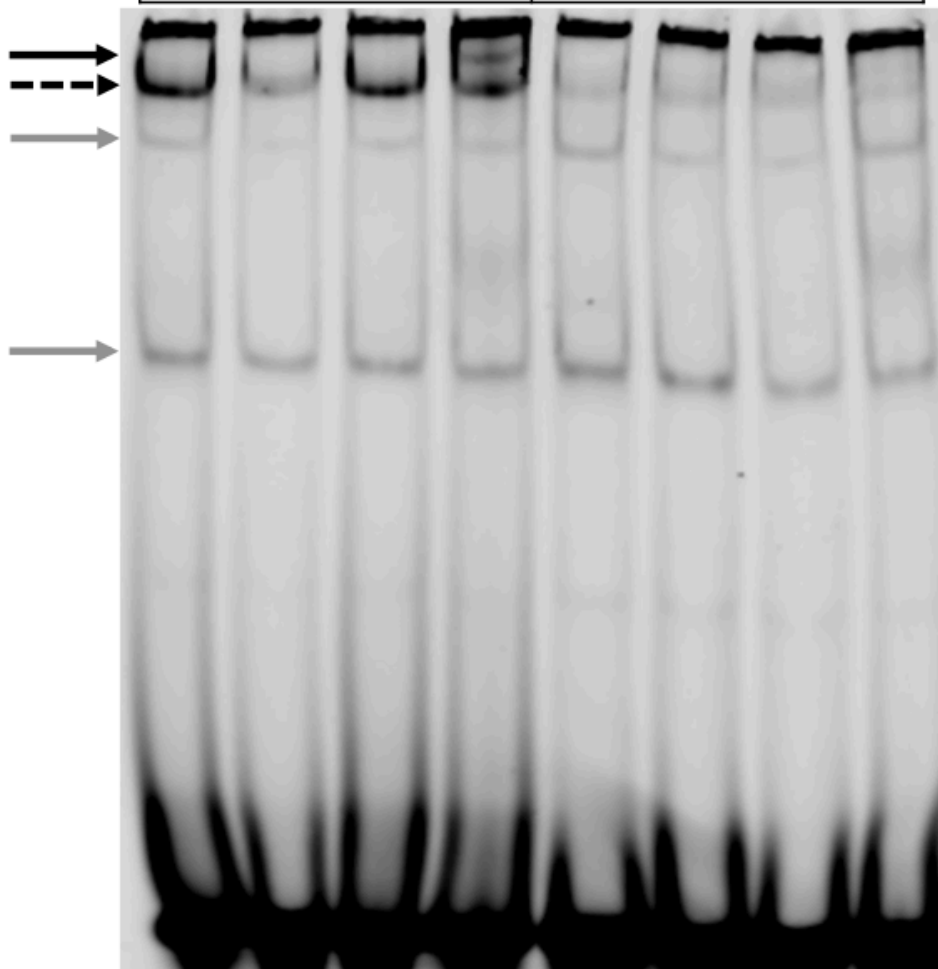

**Figure S6: Further support of allelic differences in protein binding at rs117672662.** EMSA using oligonucleotide probes containing different alleles at rs117672662 (T allele: lanes 1 to 4, C allele: lanes 5 to 8). Nuclear extracts from human monocyte THP-1 cells were incubated with IRDye-labeled double-stranded oligonucleotide probe alone (lanes 1, 5) or with 70-fold excess of unlabeled probe (lanes 2, 3, 6 and 7) or GATA1 antibodies (lanes 4 and 8). The dotted black arrow indicates probe-protein complexes, the solid black arrow indicates probe-protein-antibody complexes and the grey arrows indicate non-specific probe-protein binding complexes. The unlabeled T-allele probe shows stronger competition than the unlabeled C-allele probe. The faint band remaining in lane 2 may represent incomplete competition or another non-specific probe-protein complex.

**Table S1.** Demographic Characteristics of Discovery and Replication Cohorts

| <b>Study</b> | <b>Phase</b> | <b>N</b> | <b>Study Design</b>          | <b>Mean Platelet Count<sup>a</sup> (Standard Deviation)</b> | <b>% Female</b> | <b>Age<sup>b</sup> Mean (Standard Deviation)</b> |
|--------------|--------------|----------|------------------------------|-------------------------------------------------------------|-----------------|--------------------------------------------------|
| HCHS/SOL     | Discovery    | 12941    | Population- and family-based | 252 (65)                                                    | 59              | 46 (14)                                          |
| BioMe        | Replication  | 2854     | Population-based, unrelated  | 233 (71)                                                    | 62              | 59 (15)                                          |
| WHI          | Replication  | 3534     | Population-based, unrelated  | 245 (56)                                                    | 100             | 60 (7)                                           |
| MESA         | Replication  | 782      | Population-based, unrelated  | 234 (66)                                                    | 53              | 69 (9)                                           |

<sup>a</sup>Platelet count unit =  $10^9/L$ , <sup>b</sup>Age = years.

**Table S2.** Variants reaching the genome-wide ( $P\text{-value} < 5 \times 10^{-8}$ ) or suggestive ( $P\text{-value} < 1 \times 10^{-7}$ ) significance in HCHS/SOL

| Novel or Known | Nearest Gene(s) (genomic context) | Chromosome: position (GRCh37/hg19) | rsID        | Coded / alternative allele on (+) strand | HCHS/SOL Coded Allele Frequency | N     | Beta (Standard Error) | P-value                |
|----------------|-----------------------------------|------------------------------------|-------------|------------------------------------------|---------------------------------|-------|-----------------------|------------------------|
| Novel          | <i>ACTN1</i> (intronic)           | chr14:69425467                     | rs117672662 | T/C                                      | 0.94                            | 12491 | 0.604(0.054)          | $1.16 \times 10^{-28}$ |
| Novel          | <i>ZBTB9-BAK1</i> (intergenic)    | chr6:33524820                      | rs62405954  | T/C                                      | 0.86                            | 12491 | -0.239(0.037)         | $1.10 \times 10^{-10}$ |
| Novel          | <i>GABBR1-MOG</i> (intergenic)    | chr6:29608184                      | rs75140056  | C/CAT                                    | 0.39                            | 12491 | -0.151(0.025)         | $1.47 \times 10^{-09}$ |
| Novel          | <i>BANP-ZFPM1</i> (intergenic)    | chr16:88376014                     | rs80294974  | G/A                                      | 0.98                            | 12491 | 0.555(0.103)          | $6.60 \times 10^{-08}$ |
| Novel          | <i>ETV7</i> (intronic)            | chr6:36344980                      | rs9470264   | G/A                                      | 0.8                             | 12491 | -0.181(0.034)         | $8.80 \times 10^{-08}$ |
| Known          | <i>ARGHEF3</i> (intronic)         | chr3:56849749                      | rs1354034   | T/C                                      | 0.57                            | 12491 | -0.189(0.025)         | $6.89 \times 10^{-14}$ |
| Known          | <i>TPM4</i> (intronic)            | chr19:16203304                     | rs73517714  | C/A                                      | 0.97                            | 12491 | 0.508(0.069)          | $1.80 \times 10^{-13}$ |
| Known          | <i>AK3-RCL1</i> (intergenic)      | chr9:4744743                       | rs409801    | T/C                                      | 0.67                            | 12491 | -0.163(0.027)         | $2.21 \times 10^{-09}$ |
| Known          | <i>JMJD1C</i> (intronic)          | chr10:65071215                     | rs10822155  | C/A                                      | 0.71                            | 12491 | -0.168(0.028)         | $3.50 \times 10^{-09}$ |
| Known          | <i>HBS1L-MYB</i> (intergenic)     | chr6:135451564                     | rs6934903   | T/A                                      | 0.85                            | 12491 | -0.198(0.035)         | $2.02 \times 10^{-08}$ |
| Known          | <i>ZFPM2</i> (intronic)           | chr8:106581528                     | rs6993770   | A/T                                      | 0.69                            | 12490 | 0.148(0.027)          | $3.43 \times 10^{-08}$ |
| Known          | <i>VWF-CD9</i> (intergenic)       | chr12:6281039                      | rs11064074  | C/T                                      | 0.71                            | 12491 | 0.150(0.028)          | $5.38 \times 10^{-08}$ |

**Table S3.** Results from the generalization of European<sup>1-4</sup>, African-American<sup>5</sup>, and Japanese<sup>6</sup> GWAS PLT-associated variants to HCHS/SOL Hispanic/Latinos. The line separates the SNPs that generalized (top panel) from those that failed to generalize (bottom panel).

| rsID       | Nearest gene(s)<br>(genomic context) | Chr:Position<br>(build 37-hg19) | Coded<br>/ Alt.<br>Allele | Discovery |       |                  |              |           | HCHS/SOL |      |              |                 |          | Meta-analysis |          | Ref. |
|------------|--------------------------------------|---------------------------------|---------------------------|-----------|-------|------------------|--------------|-----------|----------|------|--------------|-----------------|----------|---------------|----------|------|
|            |                                      |                                 |                           | Ancestry  | N     | MAF <sup>a</sup> | Beta (SE)    | p-value   | MAF      | CAF  | Beta (SE)    | 2-sided p-value | r-value  | Beta (SE)     | p-value  |      |
| rs3811444  | <i>TRIM58</i><br>(nonsynonymous)     | 1:248039450                     | C/T                       | European  | 27955 | NA               | 3.35 (0.57)  | 5.6E-09   | 0.28     | 0.72 | 3.45 (0.89)  | 1.06E-04        | 5.58E-04 | 3.38 (0.48)   | 2.57E-12 | [1]  |
| rs1260326  | <i>GCKR</i><br>(nonsynonymous)       | 2:27730939                      | T/C                       | European  | 54396 | NA               | 2.33 (0.38)  | 9.12E-10  | 0.34     | 0.34 | 2.53 (0.86)  | 3.12E-03        | 9.35E-03 | 2.37 (0.35)   | 1.06E-11 | [1]  |
| rs625132   | <i>EHD3</i> (intronic)               | 2:31482299                      | G/A                       | European  | 45217 | NA               | 4.24 (0.57)  | 9.15E-14  | 0.11     | 0.89 | 3.93 (1.25)  | 1.67E-03        | 5.81E-03 | 4.18 (0.52)   | 5.97E-16 | [1]  |
| rs1354034  | <i>ARHGEF3</i> (intronic)            | 3:56849749                      | T/C                       | European  | 6234  | 0.41             | -9.44 (1.61) | 4.35E-09  | 0.43     | 0.57 | -5.87 (0.8)  | 2.44E-13        | 4.75E-04 | -6.58 (0.72)  | 4.41E-20 | [2]  |
| rs1354034  | <i>ARHGEF3</i> (intronic)            | 3:56849749                      | C/T                       | European  | 13582 | 0.39             | 7.97 (0.79)  | 6.00E-24  | 0.43     | 0.43 | 5.87 (0.8)   | 2.44E-13        | 7.32E-13 | 6.94 (0.56)   | 6.39E-35 | [3]  |
| rs6141     | <i>THPO</i> (3' downstream)          | 3:184090266                     | T/C                       | Japanese  | 14806 | 0.45             | 0.08 (0.01)  | 5.38E-11  | 0.33     | 0.67 | 0.06 (0.01)  | 3.61E-05        | 3.61E-05 | 0.07 (0.01)   | 6.75E-14 | [6]  |
| rs700585   | <i>MEF2C</i> (intronic)              | 5:88152116                      | C/T                       | European  | 55469 | NA               | 2.7 (0.44)   | 9.86E-10  | 0.19     | 0.19 | 2.41 (1.01)  | 1.70E-02        | 3.76E-02 | 2.66 (0.4)    | 5.42E-11 | [1]  |
| rs12526480 | <i>LRRCL16A</i> (intronic)           | 6:25533534                      | G/T                       | African   | 16388 | 0.31             | -4.39 (0.76) | 9.15E-29  | 0.36     | 0.36 | -2.6 (0.82)  | 1.53E-03        | 2.54E-03 | -3.56 (0.56)  | 1.66E-10 | [5]  |
| rs210134   | <i>BAK1</i> (3' downstream)          | 6:33540209                      | A/G                       | African   | 16388 | 0.29             | -6.16 (0.78) | 2.32E-15  | 0.29     | 0.29 | -4.94 (0.86) | 9.31E-09        | 9.31E-08 | -5.61 (0.58)  | 2.79E-22 | [5]  |
| rs5745568  | <i>BAK1</i> (5' upstream)            | 6:33548394                      | T/G                       | Japanese  | 14806 | 0.23             | 0.09 (0.01)  | 6.66E-11  | 0.24     | 0.24 | 0.10 (0.01)  | 1.89E-10        | 7.50E-06 | 0.09 (0.01)   | 1.48E-19 | [6]  |
| rs4895441  | <i>HBSIL-MYB</i><br>(intergenic)     | 6:135426573                     | A/G                       | European  | 13582 | 0.27             | -5.42 (0.88) | 9.00E-10  | 0.18     | 0.82 | -5.39 (1.02) | 1.24E-07        | 4.29E-05 | -5.41 (0.67)  | 5.84E-16 | [3]  |
| rs9494145  | <i>HBSIL-MYB</i><br>(intergenic)     | 6:135432552                     | C/T                       | African   | 16388 | 0.07             | 8.19 (1.38)  | 2.79E-09  | 0.16     | 0.16 | 5.88 (1.07)  | 3.92E-08        | 9.81E-08 | 6.75 (0.85)   | 1.48E-15 | [5]  |
| rs342275   | <i>AF086203</i> (intronic)           | 7:106359215                     | C/T                       | European  | 58571 | NA               | 3.74 (0.36)  | 5.57E-25  | 0.33     | 0.67 | 3.6 (0.86)   | 2.82E-05        | 2.37E-04 | 3.72 (0.33)   | 9.42E-29 | [1]  |
| rs342293   | <i>AF086203</i> (intronic)           | 7:106372219                     | G/C                       | African   | 16388 | 0.39             | -4.05 (0.72) | 1.58E-08  | 0.39     | 0.39 | -3.41 (0.82) | 2.92E-05        | 5.84E-05 | -3.77 (0.54)  | 2.88E-12 | [5]  |
| rs6993770  | <i>ZFPM2</i> (intronic)              | 8:106581527                     | A/T                       | European  | 54960 | NA               | 3.67 (0.44)  | 4.30E-17  | 0.31     | 0.69 | 4.74 (0.85)  | 2.87E-08        | 1.21E-06 | 3.89 (0.39)   | 1.52E-23 | [1]  |
| rs6995402  | <i>PLEC</i> (intronic)               | 8:145005560                     | C/T                       | European  | 57593 | NA               | 2.30 (0.37)  | 5.09E-10  | 0.05     | 0.05 | 5.27 (2.24)  | 1.88E-02        | 3.96E-02 | 2.38 (0.37)   | 7.50E-11 | [1]  |
| rs385893   | <i>AK3-RCL1</i> (intergenic)         | 9:4763176                       | T/C                       | Japanese  | 14806 | 0.25             | -0.10 (0.01) | 2.95E-13  | 0.40     | 0.60 | -0.06 (0.01) | 5.44E-06        | 1.09E-05 | -0.08 (0.01)  | 2.87E-16 | [6]  |
| rs385893   | <i>AK3-RCL1</i> (intergenic)         | 9:4763176                       | C/T                       | European  | 9316  | 0.44             | 6.26 (0.75)  | 8.50E-17  | 0.40     | 0.40 | 3.74 (0.83)  | 5.88E-06        | 1.18E-05 | 5.12 (0.56)   | 3.62E-20 | [4]  |
| rs423955   | <i>AK3-RCL1</i> (intergenic)         | 9:4792339                       | A/G                       | European  | 13582 | 0.34             | 4.94 (0.81)  | 1.0E-9    | 0.40     | 0.60 | 1.85 (0.82)  | 2.33E-02        | 2.33E-02 | 3.41 (0.57)   | 2.89E-09 | [3]  |
| rs10761731 | <i>RCL1</i> (5' upstream)            | 10:65027609                     | T/A                       | European  | 54344 | NA               | 3.85 (0.38)  | 2.02E-24  | 0.31     | 0.31 | 4.81 (0.89)  | 6.44E-08        | 1.35E-06 | 4.00 (0.35)   | 1.56E-30 | [1]  |
| rs7896518  | <i>JMJD1C</i> (intronic)             | 10:65104500                     | G/A                       | African   | 16388 | 0.32             | 5.18 (0.74)  | 2.26E-212 | 0.30     | 0.30 | 4.89 (0.89)  | 3.91E-08        | 9.81E-08 | 5.06 (0.57)   | 5.82E-19 | [5]  |
| rs505404   | <i>PSMD13</i> (intronic)             | 11:243267                       | G/T                       | European  | 54642 | NA               | 4.66 (0.45)  | 7.44E-25  | 0.26     | 0.26 | 2.53 (0.91)  | 5.68E-03        | 1.59E-02 | 4.24 (0.41)   | 1.48E-25 | [1]  |
| rs4938642  | <i>CBL</i> (intronic)                | 11:119099905                    | C/G                       | European  | 56605 | NA               | 4.73 (0.73)  | 7.66E-11  | 0.05     | 0.05 | 5.57 (1.75)  | 1.47E-03        | 5.62E-03 | 4.85 (0.67)   | 4.89E-13 | [1]  |
| rs7342306  | <i>VWF-CD9</i> (intergenic)          | 12:6291092                      | G/A                       | European  | 55636 | NA               | 2.53 (0.38)  | 4.29E-11  | 0.25     | 0.75 | 4.81 (0.92)  | 1.69E-07        | 7.75E-06 | 2.87 (0.35)   | 5.51E-16 | [1]  |
| rs4326844  | <i>COPZ1</i> (intronic)              | 12:54736470                     | A/G                       | European  | 6234  | 0.45             | -8.68 (1.59) | 4.57E-08  | 0.27     | 0.27 | -2.81 (0.93) | 2.61E-03        | 2.61E-03 | -4.31 (0.8)   | 7.95E-08 | [2]  |
| rs941207   | <i>BAZ2A</i> (intronic)              | 12:57023283                     | G/C                       | European  | 55653 | NA               | 2.75 (0.43)  | 1.74E-10  | 0.22     | 0.22 | 3.01 (0.96)  | 1.80E-03        | 5.81E-03 | 2.79 (0.39)   | 1.24E-12 | [1]  |
| rs3184504  | <i>SH2B3</i><br>(nonsynonymous)      | 12:111884607                    | T/C                       | European  | 56354 | NA               | 3.99 (0.37)  | 1.22E-26  | 0.27     | 0.27 | 3.75 (0.96)  | 8.61E-05        | 5.17E-04 | 3.96 (0.35)   | 6.19E-30 | [1]  |
| rs739496   | <i>SH2B3</i> (3' UTR)                | 12:111887659                    | A/G                       | Japanese  | 14806 | 0.16             | -0.14 (0.02) | 4.75E-19  | 0.31     | 0.69 | -0.06 (0.01) | 2.94E-05        | 3.61E-05 | -0.09 (0.01)  | 3.59E-19 | [6]  |
| rs11065987 | <i>BRAP</i> (intergenic)             | 12:112072424                    | G/A                       | European  | 9316  | 0.34             | 5.07 (0.69)  | 2.20E-13  | 0.25     | 0.25 | 3.65 (0.97)  | 1.79E-04        | 1.79E-04 | 4.60 (0.56)   | 3.75E-16 | [4]  |

|            |                                     |              |     |          |       |      |              |          |      |      |               |          |          |              |          |     |
|------------|-------------------------------------|--------------|-----|----------|-------|------|--------------|----------|------|------|---------------|----------|----------|--------------|----------|-----|
| rs6490294  | <i>ACAD10</i> (intronic)            | 12:112190438 | C/A | African  | 16388 | 0.34 | -4.38 (0.75) | 4.78E-09 | 0.37 | 0.63 | -2.5 (0.86)   | 3.44E-03 | 4.91E-03 | -3.56 (0.56) | 2.62E-10 | [5] |
| rs4148441  | <i>ABCC4</i> (intronic)             | 13:95898206  | G/A | European | 64120 | NA   | 4.12 (0.6)   | 6.76E-12 | 0.14 | 0.86 | 4.19 (1.14)   | 2.48E-04 | 1.16E-03 | 4.13 (0.53)  | 7.32E-15 | [1] |
| rs11628318 | <i>ANKRD9-RCOR1</i> (intergenic)    | 14:103040086 | A/T | European | 62438 | NA   | 2.57 (0.41)  | 2.04E-10 | 0.38 | 0.62 | 2.07 (0.83)   | 1.27E-02 | 2.96E-02 | 2.48 (0.36)  | 1.04E-11 | [1] |
| rs2297067  | <i>EXOC3L4</i> (nonsynonymous)      | 14:103566784 | T/C | European | 41687 | NA   | 3.54 (0.55)  | 1.58E-10 | 0.20 | 0.20 | 2.65 (0.98)   | 7.04E-03 | 1.83E-02 | 3.32 (0.48)  | 5.29E-12 | [1] |
| rs10512472 | <i>SLFN14</i> (nonsynonymous)       | 17:33884803  | C/T | European | 58692 | NA   | 3.64 (0.48)  | 2.40E-14 | 0.23 | 0.23 | 3.08 (0.94)   | 1.10E-03 | 4.63E-03 | 3.52 (0.43)  | 1.29E-16 | [1] |
| rs11082304 | <i>CABLES1</i> (intronic)           | 18:20720972  | G/T | European | 58215 | NA   | 2.48 (0.38)  | 5.27E-11 | 0.36 | 0.64 | 3.36 (0.83)   | 5.01E-05 | 3.50E-04 | 2.63 (0.34)  | 1.97E-14 | [1] |
| rs8109288  | <i>TPM4</i> (intronic)              | 19:16185558  | G/A | European | 29014 | NA   | 11.95 (1.89) | 2.75E-10 | 0.03 | 0.97 | 13.83 (2.46)  | 2.01E-08 | 3.73E-05 | 12.64 (1.5)  | 3.61E-17 | [1] |
| rs8109288  | <i>TPM4</i> (intronic)              | 19:16185559  | A/G | African  | 16388 | 0.10 | -8.72 (1.4)  | 5.02E-10 | 0.03 | 0.03 | -13.83 (2.46) | 2.01E-08 | 9.81E-08 | -9.97 (1.22) | 2.67E-16 | [5] |
| rs17356664 | <i>EXCOC3L2-MARK4</i> (intergenic)  | 19:45740770  | C/T | European | 55487 | NA   | 2.60 (0.42)  | 3.60E-10 | 0.19 | 0.81 | 2.81 (1.05)   | 7.41E-03 | 1.83E-02 | 2.63 (0.39)  | 9.86E-12 | [1] |
| rs2336384  | <i>MFN2</i> (intronic)              | 1:12046062   | G/T | European | 57366 | NA   | 2.17 (0.38)  | 1.25E-08 | 0.43 | 0.43 | 1.12 (0.81)   | 1.67E-01 | 2.42E-01 | 1.98 (0.35)  | 9.99E-09 | [1] |
| rs10914144 | <i>DNM3</i> (intronic)              | 1:171949749  | T/C | European | 54978 | NA   | 3.42 (0.49)  | 2.22E-12 | 0.22 | 0.22 | 1.94 (0.99)   | 4.96E-02 | 8.68E-02 | 3.13 (0.44)  | 7.97E-13 | [1] |
| rs1668871  | <i>TMCC2</i> (intronic)             | 1:205237136  | C/T | European | 58108 | NA   | 2.80 (0.37)  | 2.59E-14 | 0.23 | 0.23 | -0.41 (0.94)  | 6.62E-01 | 1.00E+00 | 2.38 (0.34)  | 4.09E-12 | [1] |
| rs7550918  | <i>GCSAMLL</i> (intronic)           | 1:247675558  | T/C | European | 54171 | NA   | 3.13 (0.47)  | 2.91E-11 | 0.27 | 0.73 | 0.97 (0.9)    | 2.78E-01 | 3.54E-01 | 2.67 (0.42)  | 1.62E-10 | [1] |
| rs17030845 | <i>THADA</i> (intronic)             | 2:43687878   | C/T | European | 65738 | NA   | 3.58 (0.56)  | 1.27E-10 | 0.08 | 0.92 | 1.13 (1.49)   | 4.50E-01 | 4.97E-01 | 3.28 (0.52)  | 3.14E-10 | [1] |
| rs7694379  | <i>KLHL8-HSD17B13</i> (intergenic)  | 4:88186508   | A/G | European | 56430 | NA   | 2.13 (0.37)  | 8.70E-09 | 0.32 | 0.32 | 0.02 (0.87)   | 9.83E-01 | 1.00E+00 | 1.80 (0.34)  | 1.16E-07 | [1] |
| rs17568628 | <i>F2R-F2RL1</i> (intergenic)       | 5:76046938   | T/C | European | 44759 | NA   | 6.07 (0.99)  | 9.61E-10 | 0.02 | 0.98 | 6.13 (3.02)   | 4.24E-02 | 7.74E-02 | 6.08 (0.94)  | 1.16E-10 | [1] |
| rs2070729  | <i>IRF1</i> (intronic)              | 5:131819920  | A/C | European | 56469 | NA   | 2.39 (0.37)  | 1.13E-10 | 0.45 | 0.55 | 0.58 (0.82)   | 4.76E-01 | 5.12E-01 | 2.08 (0.34)  | 6.85E-10 | [1] |
| rs13236689 | <i>CD36</i> (intronic)              | 7:80236014   | G/T | African  | 16388 | 0.44 | 4.18 (0.7)   | 2.84E-09 | 0.36 | 0.36 | 1.64 (0.84)   | 5.00E-02 | 6.02E-02 | 3.14 (0.54)  | 5.26E-09 | [5] |
| rs4731120  | <i>WASL-HYALP1</i> (intergenic)     | 7:123411222  | C/A | European | 66147 | NA   | 4.14 (0.59)  | 2.77E-12 | 0.06 | 0.06 | 2.25 (1.63)   | 1.67E-01 | 2.42E-01 | 3.92 (0.56)  | 1.85E-12 | [1] |
| rs4246215  | <i>FEN1</i> (3' UTR)                | 11:61564298  | T/G | European | 56299 | NA   | 2.45 (0.39)  | 3.31E-10 | 0.49 | 0.49 | 1.87 (0.9)    | 3.85E-02 | 7.35E-02 | 2.36 (0.36)  | 4.39E-11 | [1] |
| rs477895   | <i>BAD</i> (intronic)               | 11:64048912  | C/T | African  | 16388 | 0.45 | -4.19 (0.77) | 4.91E-08 | 0.21 | 0.21 | -1.94 (1.01)  | 5.42E-02 | 6.02E-02 | -3.36 (0.61) | 3.99E-08 | [5] |
| rs17824620 | <i>RPH3A</i> (intronic)             | 12:113100993 | C/A | European | 51530 | NA   | 2.46 (0.43)  | 9.67E-09 | 0.32 | 0.68 | 1.09 (0.86)   | 2.10E-01 | 2.93E-01 | 2.19 (0.38)  | 1.19E-08 | [1] |
| rs7961894  | <i>WDR66</i> (intronic)             | 12:122365582 | C/T | European | 51897 | NA   | 3.92 (0.61)  | 1.22E-10 | 0.07 | 0.93 | 1.97 (1.6)    | 2.18E-01 | 2.95E-01 | 3.68 (0.57)  | 1.06E-10 | [1] |
| rs8022206  | <i>RAD61B</i> (intronic)            | 14:68520905  | G/A | European | 52251 | NA   | 3.20 (0.5)   | 1.55E-10 | 0.18 | 0.82 | 0.49 (1.03)   | 6.36E-01 | 6.67E-01 | 2.68 (0.45)  | 2.51E-09 | [1] |
| rs8006385  | <i>ITPK1</i> (intronic)             | 14:93501025  | G/A | European | 64929 | NA   | 3.59 (0.56)  | 1.24E-10 | 0.11 | 0.11 | 1.12 (1.29)   | 3.85E-01 | 4.49E-01 | 3.2 (0.51)   | 4.26E-10 | [1] |
| rs7149242  | <i>BEGAIN-DLKI</i> (intergenic)     | 14:101159415 | G/T | European | 61247 | NA   | 2.14 (0.39)  | 2.68E-08 | 0.32 | 0.68 | 0.73 (0.87)   | 4.02E-01 | 4.56E-01 | 1.91 (0.35)  | 5.77E-08 | [1] |
| rs3809566  | <i>TPM1</i> (5' upstream)           | 15:63333723  | G/A | European | 57113 | NA   | 2.44 (0.39)  | 3.65E-10 | 0.27 | 0.73 | 1.08 (0.89)   | 2.26E-01 | 2.96E-01 | 2.22 (0.36)  | 4.84E-10 | [1] |
| rs1719271  | <i>PLEKHO2-ANKDD1A</i> (intergenic) | 15:65183800  | G/A | European | 56782 | NA   | 3.41 (0.5)   | 1.05E-11 | 0.27 | 0.27 | 0.94 (0.92)   | 3.04E-01 | 3.76E-01 | 2.85 (0.44)  | 1.05E-10 | [1] |
| rs6065     | <i>GP1BA</i> (nonsynonymous)        | 17:4836380   | T/C | European | 64987 | NA   | 4.19 (0.63)  | 2.92E-11 | 0.14 | 0.14 | 2.13 (1.15)   | 6.34E-02 | 1.07E-01 | 3.71 (0.55)  | 1.77E-11 | [1] |
| rs397969   | <i>ULK2-AKAP10</i> (intergenic)     | 17:19804246  | C/T | European | 60944 | NA   | 2.13 (0.36)  | 2.32E-09 | 0.43 | 0.43 | 0.71 (0.8)    | 3.78E-01 | 4.49E-01 | 1.89 (0.33)  | 6.23E-09 | [1] |
| rs559972   | <i>TAOK1</i> (intronic)             | 17:27814495  | T/C | European | 53460 | NA   | 3.26 (0.38)  | 3.30E-18 | 0.39 | 0.39 | 1.19 (0.81)   | 1.43E-01 | 2.22E-01 | 2.9 (0.34)   | 1.64E-17 | [1] |
| rs708382   | <i>FAM171A2</i> (5' upstream)       | 17:42442343  | T/C | European | 50036 | NA   | 2.44 (0.43)  | 1.51E-08 | 0.37 | 0.63 | 1.81 (0.81)   | 2.55E-02 | 5.10E-02 | 2.3 (0.38)   | 1.50E-09 | [1] |
| rs151361   | <i>SLMO2</i> (intronic)             | 20:57614002  | G/A | African  | 16388 | 0.26 | 4.49 (0.78)  | 9.44E-09 | 0.21 | 0.21 | 1.51 (0.98)   | 1.22E-01 | 1.22E-01 | 3.33 (0.61)  | 4.73E-08 | [5] |
| rs1034566  | <i>ARVCF</i> (intronic)             | 22:19984276  | T/C | European | 61469 | NA   | 2.13 (0.38)  | 3.06E-08 | 0.21 | 0.21 | 1.79 (0.98)   | 6.87E-02 | 1.11E-01 | 2.08 (0.36)  | 5.73E-09 | [1] |

SNPs previously reported as genome-wide significant in GWA studies of platelet count that met or exceeded the generalization p-value are included. <sup>a</sup>Allele frequencies reported for 1000G CEU, not study population, by Soranzo, et al, 2009.,MAF = Minor Allele Frequency; CAF = Coded Allele Frequency; SE= Standard Error. Study population allele frequency not reported (NA) by Gieger, et al, 2011.

**Table S4.** Count of European, African, and Native American ancestral alleles vs. genotype rs117672662 on chromosome 14

|                 | <b>Ancestral Allele Count</b> |                             |          |          |
|-----------------|-------------------------------|-----------------------------|----------|----------|
|                 |                               | <b>rs117672662 Genotype</b> |          |          |
|                 |                               | <b>0</b>                    | <b>1</b> | <b>2</b> |
| European        | <b>0</b>                      | 64                          | 743      | 2,325    |
|                 | <b>1</b>                      | 0                           | 625      | 4,797    |
|                 | <b>2</b>                      | 0                           | 16       | 4,223    |
| African         | <b>0</b>                      | 64                          | 1,246    | 8,450    |
|                 | <b>1</b>                      | 0                           | 138      | 2,338    |
|                 | <b>2</b>                      | 0                           | 0        | 557      |
| Native American | <b>0</b>                      | 0                           | 19       | 6,625    |
|                 | <b>1</b>                      | 0                           | 757      | 3,445    |
|                 | <b>2</b>                      | 64                          | 608      | 1,275    |

**Table S5.** Association of novel PLT variants from the HCHS/SOL discovery analysis with mean platelet volume (MPV) in a subset of the replication samples (N=4041)

| Annotated Gene(s)<br>(location)   | Chromosome:<br>Position<br>(build 37-hg19) | rsID        | Coded/<br>Alt. Allele<br>on (+)<br>strand | WHI   |              |         | BioMe |              |         | Meta-analysis |              |         |
|-----------------------------------|--------------------------------------------|-------------|-------------------------------------------|-------|--------------|---------|-------|--------------|---------|---------------|--------------|---------|
|                                   |                                            |             |                                           | N     | Beta (SE)    | p-value | N     | Beta (SE)    | p-value | N             | Beta (SE)    | p-value |
| <i>ACTN1</i> (intronic)           | chr14:69425467                             | rs117672662 | T/C                                       | 1,187 | 0.46 (0.09)  | 6.5E-08 | 2,854 | 0.63 (0.09)  | 6.7E-12 | 4,041         | 0.54 (0.06)  | 3.9E-18 |
| <i>ZBTB9-BAKI</i><br>(intergenic) | chr6:33524820                              | rs62405954  | T/C                                       | 1,187 | -0.11 (0.08) | 0.156   | 2,854 | -0.10 (0.06) | 0.112   | 4,041         | -0.10 (0.05) | 0.032   |
| <i>GABBR1-MOG</i><br>(intergenic) | chr6:29608184                              | rs75140056  | C/CAT                                     | 1,187 | 0.15 (0.06)  | 0.011   | 2,854 | 0.06 (0.03)  | 0.049   | 4,041         | 0.08 (0.03)  | 0.003   |
| <i>ETV7</i> (intronic)            | chr6:36344980                              | rs9470264   | G/A                                       | 1,187 | -0.16 (0.03) | 0.009   | 2,854 | -0.24 (0.05) | 4.5E-07 | 4,041         | -0.18 (0.02) | 1.9E-15 |
| <i>MEF2C</i> (intronic)           | chr5:88133921                              | rs144261491 | C/T                                       | 1,187 | 0.12 (0.15)  | 0.415   | NA    | NA           | NA      | 4,041         | 0.12 (0.15)  | 0.42    |

SE= Standard Error

**Table S6.** Datasets used for functional annotation and their sources.

| Dataset <sup>a</sup>                                                            | Project/Study                     | Download/Access resource                                                                                   |
|---------------------------------------------------------------------------------|-----------------------------------|------------------------------------------------------------------------------------------------------------|
| All datasets of CD34-negative, CD41-positive, CD42-positive megakaryocyte cells | BLUEPRINT <sup>7</sup>            | UCSC browser, BLUEPRINT trackhub                                                                           |
| All K562 datasets                                                               | ENCODE <sup>8</sup>               | UCSC browser, ENCODE Analysis trackhub and Integrated Regulation from ENCODE Tracks                        |
| GSM607949(GATA1 in megakaryocytes)                                              | Tjissen et al, 2011 <sup>9</sup>  | CODEX, <a href="http://codex.stemcells.cam.ac.uk/">http://codex.stemcells.cam.ac.uk/</a>                   |
| GSM607950(GATA2 in megakaryocytes)                                              | Tjissen et al, 2011 <sup>9</sup>  | CODEX, <a href="http://codex.stemcells.cam.ac.uk/">http://codex.stemcells.cam.ac.uk/</a>                   |
| GSM607951(RUNX1 in megakaryocytes)                                              | Tjissen et al, 2011 <sup>9</sup>  | CODEX, <a href="http://codex.stemcells.cam.ac.uk/">http://codex.stemcells.cam.ac.uk/</a>                   |
| GSM607952(FLI1 in megakaryocytes)                                               | Tjissen et al, 2011 <sup>9</sup>  | CODEX, <a href="http://codex.stemcells.cam.ac.uk/">http://codex.stemcells.cam.ac.uk/</a>                   |
| GSM607953(TAL1 in megakaryocytes)                                               | Tjissen et al, 2011 <sup>9</sup>  | CODEX, <a href="http://codex.stemcells.cam.ac.uk/">http://codex.stemcells.cam.ac.uk/</a>                   |
| GSE23730(SKNO-1_ERG)                                                            | Martens et al, 2012 <sup>10</sup> | BLOODCHIP, <a href="http://149.171.101.136/python/BloodChIP/">http://149.171.101.136/python/BloodChIP/</a> |
| GSE23730(SKNO-1_FLI1)                                                           | Martens et al, 2012 <sup>10</sup> | BLOODCHIP, <a href="http://149.171.101.136/python/BloodChIP/">http://149.171.101.136/python/BloodChIP/</a> |
| GSE23730(SKNO-1_RUNX1)                                                          | Martens et al, 2012 <sup>10</sup> | BLOODCHIP, <a href="http://149.171.101.136/python/BloodChIP/">http://149.171.101.136/python/BloodChIP/</a> |

<sup>a</sup>All datasets were mapped against Human Genome Build 37/hg19

**Table S7.** Significant Blood Browser<sup>11</sup> cis-eQTL for Results for PLT-associated SNPs and their LD partners ( $r^2 \geq 0.4$ )

| Gene              | Index rsID | Proxy rsID | Chr: Position (build 37/hg19) | $r^2$ | type <sup>a</sup> | p-value  | Probe Center Position | Alleles on (+) strand | Allele Assessed | Overall Z-Score | HUGO Gene Name      | FDR   |
|-------------------|------------|------------|-------------------------------|-------|-------------------|----------|-----------------------|-----------------------|-----------------|-----------------|---------------------|-------|
| <i>ETV7</i>       | rs9470264  | rs7758498  | 6:36344213                    | 0.53  | 0                 | 3.80E-18 | 6:36686912            | G/A                   | A               | -8.69           | -                   | 0     |
| <i>ETV7</i>       | rs9470264  | rs7758498  | 6:36344213                    | 0.53  | 0                 | 6.50E-07 | 6:36570090            | G/A                   | A               | 4.98            | <i>STK38</i>        | 0     |
| <i>ETV7</i>       | rs9470264  | rs7758498  | 6:36344213                    | 0.53  | 0                 | 1.10E-06 | 6:36565873            | G/A                   | A               | -4.87           | <i>KCTD20</i>       | 0     |
| <i>ETV7</i>       | rs9470264  | rs7758498  | 6:36344213                    | 0.53  | 0                 | 2.10E-06 | 6:36678715            | G/A                   | A               | -4.75           | <i>SFRS3</i>        | 0.001 |
| <i>ETV7</i>       | rs9470264  | rs1998266  | 6:36358289                    | 0.58  | 2                 | 3.10E-28 | 6:36686912            | C/T                   | T               | -11.02          | -                   | 0     |
| <i>ETV7</i>       | rs9470264  | rs1998266  | 6:36358289                    | 0.58  | 2                 | 2.70E-08 | 6:36678715            | C/T                   | T               | -5.56           | <i>SFRS3</i>        | 0     |
| <i>ETV7</i>       | rs9470264  | rs1998266  | 6:36358289                    | 0.58  | 2                 | 1.70E-07 | 6:36570090            | C/T                   | T               | 5.23            | <i>STK38</i>        | 0     |
| <i>ETV7</i>       | rs9470264  | rs4713971  | 6:36369786                    | 0.40  | 0                 | 2.60E-23 | 6:36686912            | G/C                   | G               | -9.95           | -                   | 0     |
| <i>ETV7</i>       | rs9470264  | rs4713971  | 6:36369786                    | 0.40  | 0                 | 3.30E-08 | 6:36678715            | G/C                   | G               | -5.53           | <i>SFRS3</i>        | 0     |
| <i>ETV7</i>       | rs9470264  | rs4713971  | 6:36369786                    | 0.40  | 0                 | 3.10E-07 | 6:36570090            | G/C                   | G               | 5.12            | <i>STK38</i>        | 0     |
| <i>ETV7</i>       | rs9470264  | rs941816   | 6:36375304                    | 0.40  | 2                 | 9.60E-24 | 6:36686912            | G/A                   | G               | -10.05          | -                   | 0     |
| <i>ETV7</i>       | rs9470264  | rs941816   | 6:36375304                    | 0.40  | 2                 | 4.00E-08 | 6:36678715            | G/A                   | G               | -5.49           | <i>SFRS3</i>        | 0     |
| <i>ETV7</i>       | rs9470264  | rs941816   | 6:36375304                    | 0.40  | 2                 | 3.00E-07 | 6:36570090            | G/A                   | G               | 5.12            | <i>STK38</i>        | 0     |
| <i>ETV7</i>       | rs9470264  | rs6457915  | 6:36380644                    | 0.40  | 0                 | 3.30E-08 | 6:36678715            | T/C                   | C               | -5.52           | <i>SFRS3</i>        | 0     |
| <i>ETV7</i>       | rs9470264  | rs6457915  | 6:36380644                    | 0.40  | 0                 | 2.10E-23 | 6:36686912            | T/C                   | C               | -9.97           | -                   | 0     |
| <i>ETV7</i>       | rs9470264  | rs6457915  | 6:36380644                    | 0.40  | 0                 | 2.50E-07 | 6:36570090            | T/C                   | C               | 5.16            | <i>STK38</i>        | 0     |
| <i>ETV7</i>       | rs9470264  | rs4713975  | 6:36395761                    | 0.59  | 2                 | 2.10E-34 | 6:36686912            | G/A                   | A               | -12.23          | -                   | 0     |
| <i>ETV7</i>       | rs9470264  | rs4713975  | 6:36395761                    | 0.59  | 2                 | 1.50E-08 | 6:36565873            | G/A                   | A               | -5.67           | <i>KCTD20</i>       | 0     |
| <i>ETV7</i>       | rs9470264  | rs4713975  | 6:36395761                    | 0.59  | 2                 | 1.10E-08 | 6:36570090            | G/A                   | A               | 5.72            | <i>STK38</i>        | 0     |
| <i>ETV7</i>       | rs9470264  | rs4713975  | 6:36395761                    | 0.59  | 2                 | 4.60E-08 | 6:36678715            | G/A                   | A               | -5.47           | <i>SFRS3</i>        | 0     |
| <i>ETV7</i>       | rs9470264  | rs1744653  | 6:36397688                    | 0.46  | 0                 | 6.50E-11 | 6:36678715            | G/A                   | A               | -6.53           | <i>SFRS3</i>        | 0     |
| <i>ETV7</i>       | rs9470264  | rs1744653  | 6:36397688                    | 0.46  | 0                 | 8.00E-24 | 6:36686912            | G/A                   | A               | -10.06          | -                   | 0     |
| <i>ETV7</i>       | rs9470264  | rs1744653  | 6:36397688                    | 0.46  | 0                 | 2.40E-05 | 6:36570090            | G/A                   | A               | 4.23            | <i>STK38</i>        | 0.011 |
| <i>ETV7</i>       | rs9470264  | rs7741260  | 6:36399120                    | 0.46  | 2                 | 6.90E-24 | 6:36686912            | C/T                   | T               | -10.08          | -                   | 0     |
| <i>ETV7</i>       | rs9470264  | rs7741260  | 6:36399120                    | 0.46  | 2                 | 5.40E-11 | 6:36678715            | C/T                   | T               | -6.56           | <i>SFRS3</i>        | 0     |
| <i>ETV7</i>       | rs9470264  | rs7741260  | 6:36399120                    | 0.46  | 2                 | 2.40E-05 | 6:36570090            | C/T                   | T               | 4.23            | <i>STK38</i>        | 0.011 |
| <i>ETV7</i>       | rs9470264  | rs16888605 | 6:36433408                    | 0.57  | 0                 | 3.50E-09 | 6:36565873            | A/G                   | G               | -5.9            | <i>KCTD20</i>       | 0     |
| <i>ETV7</i>       | rs9470264  | rs16888605 | 6:36433408                    | 0.57  | 0                 | 1.40E-35 | 6:36686912            | A/G                   | G               | -12.45          | -                   | 0     |
| <i>ETV7</i>       | rs9470264  | rs16888605 | 6:36433408                    | 0.57  | 0                 | 9.40E-09 | 6:36678715            | A/G                   | G               | -5.74           | <i>SFRS3</i>        | 0     |
| <i>ETV7</i>       | rs9470264  | rs16888605 | 6:36433408                    | 0.57  | 0                 | 2.80E-09 | 6:36570090            | A/G                   | G               | 5.94            | <i>STK38</i>        | 0     |
| <i>ETV7</i>       | rs9470264  | rs4713978  | 6:36466787                    | 0.56  | 2                 | 1.20E-08 | 6:36678715            | C/A                   | A               | -5.7            | <i>SFRS3</i>        | 0     |
| <i>ETV7</i>       | rs9470264  | rs4713978  | 6:36466787                    | 0.56  | 2                 | 1.40E-09 | 6:36570090            | C/A                   | A               | 6.06            | <i>STK38</i>        | 0     |
| <i>ETV7</i>       | rs9470264  | rs4713978  | 6:36466787                    | 0.56  | 2                 | 1.60E-36 | 6:36686912            | C/A                   | A               | -12.62          | -                   | 0     |
| <i>ETV7</i>       | rs9470264  | rs4713978  | 6:36466787                    | 0.56  | 2                 | 7.40E-10 | 6:36565873            | C/A                   | A               | -6.16           | <i>KCTD20</i>       | 0     |
| <i>GABBR1-MOG</i> | rs75140056 | rs29273    | 6:29610989                    | 0.45  | 2                 | 2.10E-09 | 6:29811988            | G/C                   | C               | 5.99            | <i>AL645939.6-3</i> | 0     |
| <i>GABBR1-MOG</i> | rs75140056 | rs29273    | 6:29610989                    | 0.45  | 2                 | 3.40E-21 | 6:29906646            | G/C                   | C               | 9.45            | <i>HLA-G</i>        | 0     |
| <i>GABBR1-MOG</i> | rs75140056 | rs29273    | 6:29610989                    | 0.45  | 2                 | 1.10E-48 | 6:29800135            | G/C                   | C               | -14.66          | <i>HLA-F</i>        | 0     |
| <i>GABBR1-MOG</i> | rs75140056 | rs9257928  | 6:29613218                    | 0.42  | 0                 | 3.20E-35 | 6:29800135            | C/T                   | T               | -12.38          | <i>HLA-F</i>        | 0     |
| <i>GABBR1-MOG</i> | rs75140056 | rs9257928  | 6:29613218                    | 0.42  | 0                 | 4.60E-10 | 6:29811988            | C/T                   | T               | 6.23            | <i>AL645939.6-3</i> | 0     |
| <i>GABBR1-MOG</i> | rs75140056 | rs9257928  | 6:29613218                    | 0.42  | 0                 | 1.40E-09 | 6:29906646            | C/T                   | T               | 6.06            | <i>HLA-G</i>        | 0     |
| <i>GABBR1-MOG</i> | rs75140056 | rs29269    | 6:29617747                    | 0.45  | 2                 | 1.10E-48 | 6:29800135            | C/T                   | T               | -14.67          | <i>HLA-F</i>        | 0     |
| <i>GABBR1-MOG</i> | rs75140056 | rs29269    | 6:29617747                    | 0.45  | 2                 | 1.60E-09 | 6:29811988            | C/T                   | T               | 6.04            | <i>AL645939.6-3</i> | 0     |
| <i>GABBR1-MOG</i> | rs75140056 | rs29269    | 6:29617747                    | 0.45  | 2                 | 3.70E-21 | 6:29906646            | C/T                   | T               | 9.44            | <i>HLA-G</i>        | 0     |
| <i>GABBR1-MOG</i> | rs75140056 | rs29231    | 6:29618525                    | 0.44  | 2                 | 2.40E-09 | 6:29811988            | C/T                   | T               | 5.97            | <i>AL645939.6-3</i> | 0     |
| <i>GABBR1-MOG</i> | rs75140056 | rs29231    | 6:29618525                    | 0.44  | 2                 | 1.10E-46 | 6:29800135            | C/T                   | T               | -14.35          | <i>HLA-F</i>        | 0     |
| <i>GABBR1-MOG</i> | rs75140056 | rs29231    | 6:29618525                    | 0.44  | 2                 | 1.80E-20 | 6:29906646            | C/T                   | T               | 9.28            | <i>HLA-G</i>        | 0     |
| <i>GABBR1-MOG</i> | rs75140056 | rs2535246  | 6:29636409                    | 0.42  | 2                 | 3.40E-10 | 6:29811988            | T/G                   | G               | 6.28            | <i>AL645939.6-3</i> | 0     |
| <i>GABBR1-MOG</i> | rs75140056 | rs2535246  | 6:29636409                    | 0.42  | 2                 | 1.20E-20 | 6:29906646            | T/G                   | G               | 9.32            | <i>HLA-G</i>        | 0     |



|            |            |            |            |      |   |          |            |     |   |        |               |          |
|------------|------------|------------|------------|------|---|----------|------------|-----|---|--------|---------------|----------|
| GABBR1-MOG | rs75140056 | rs2535246  | 6:29636409 | 0.42 | 2 | 3.40E-47 | 6:29800135 | T/G | G | -14.43 | HLA-F         | 0        |
| GABBR1-MOG | rs75140056 | rs2535246  | 6:29636409 | 0.42 | 2 | 3.60E-05 | 6:29783657 | T/G | G | 4.13   | -             | 0.016    |
| GABBR1-MOG | rs75140056 | rs1122947  | 6:29638434 | 0.42 | 2 | 2.70E-47 | 6:29800135 | A/G | G | -14.44 | HLA-F         | 0        |
| GABBR1-MOG | rs75140056 | rs1122947  | 6:29638434 | 0.42 | 2 | 3.40E-10 | 6:29811988 | A/G | G | 6.28   | AL645939.6-3  | 0        |
| GABBR1-MOG | rs75140056 | rs1122947  | 6:29638434 | 0.42 | 2 | 1.00E-20 | 6:29906646 | A/G | G | 9.33   | HLA-G         | 0        |
| GABBR1-MOG | rs75140056 | rs1122947  | 6:29638434 | 0.42 | 2 | 3.60E-05 | 6:29783657 | A/G | G | 4.13   | -             | 0.016    |
| GABBR1-MOG | rs75140056 | rs2747453  | 6:29654943 | 0.44 | 2 | 1.40E-49 | 6:29800135 | T/C | C | -14.8  | HLA-F         | 0        |
| GABBR1-MOG | rs75140056 | rs2747453  | 6:29654943 | 0.44 | 2 | 1.40E-22 | 6:29906646 | T/C | C | 9.78   | HLA-G         | 0        |
| GABBR1-MOG | rs75140056 | rs2747453  | 6:29654943 | 0.44 | 2 | 1.20E-08 | 6:29811988 | T/C | C | 5.7    | AL645939.6-3  | 0        |
| GABBR1-MOG | rs75140056 | rs3129090  | 6:29664131 | 0.44 | 2 | 7.60E-44 | 6:29800135 | C/T | T | -13.89 | HLA-F         | 0        |
| GABBR1-MOG | rs75140056 | rs3129090  | 6:29664131 | 0.44 | 2 | 2.90E-09 | 6:29811988 | C/T | T | 5.94   | AL645939.6-3  | 0        |
| GABBR1-MOG | rs75140056 | rs3129090  | 6:29664131 | 0.44 | 2 | 8.50E-22 | 6:29906646 | C/T | T | 9.59   | HLA-G         | 0        |
| GABBR1-MOG | rs75140056 | rs3131879  | 6:29665458 | 0.43 | 0 | 2.40E-09 | 6:29811988 | A/C | C | 5.97   | AL645939.6-3  | 0        |
| GABBR1-MOG | rs75140056 | rs3131879  | 6:29665458 | 0.43 | 0 | 1.30E-22 | 6:29906646 | A/C | C | 9.78   | HLA-G         | 0        |
| GABBR1-MOG | rs75140056 | rs3131879  | 6:29665458 | 0.43 | 0 | 1.00E-41 | 6:29800135 | A/C | C | -13.53 | HLA-F         | 0        |
| GABBR1-MOG | rs75140056 | rs9258102  | 6:29668913 | 0.43 | 2 | 5.40E-22 | 6:29906646 | T/C | C | 9.64   | HLA-G         | 0        |
| GABBR1-MOG | rs75140056 | rs9258102  | 6:29668913 | 0.43 | 2 | 4.70E-44 | 6:29800135 | T/C | C | -13.92 | HLA-F         | 0        |
| GABBR1-MOG | rs75140056 | rs9258102  | 6:29668913 | 0.43 | 2 | 2.80E-09 | 6:29811988 | T/C | C | 5.94   | AL645939.6-3  | 0        |
| GABBR1-MOG | rs75140056 | rs9258114  | 6:29669640 | 0.43 | 2 | 7.10E-09 | 6:29811988 | C/A | A | 5.79   | AL645939.6-3  | 0        |
| GABBR1-MOG | rs75140056 | rs9258114  | 6:29669640 | 0.43 | 2 | 1.10E-62 | 6:29800135 | C/A | A | -16.71 | HLA-F         | 0        |
| GABBR1-MOG | rs75140056 | rs9258114  | 6:29669640 | 0.43 | 2 | 8.60E-19 | 6:29906646 | C/A | A | 8.85   | HLA-G         | 0        |
| GABBR1-MOG | rs75140056 | rs6456993  | 6:29670536 | 0.43 | 0 | 1.70E-21 | 6:29906646 | G/A | A | 9.52   | HLA-G         | 0        |
| GABBR1-MOG | rs75140056 | rs6456993  | 6:29670536 | 0.43 | 0 | 7.20E-45 | 6:29800135 | G/A | A | -14.05 | HLA-F         | 0        |
| GABBR1-MOG | rs75140056 | rs6456993  | 6:29670536 | 0.43 | 0 | 8.60E-10 | 6:29811988 | G/A | A | 6.13   | AL645939.6-3  | 0        |
| BAK1       | rs62405954 | rs12206050 | 6:33564296 | 0.46 | 0 | 3.18E-05 | 6:33493262 | A/T | T | 4.16   | CUTA          | 0.014    |
| BAK1       | rs62405954 | rs12206050 | 6:33564296 | 0.46 | 0 | 3.88E-12 | 6:33492459 | A/T | T | 6.94   | CUTA          | 0        |
| BAK1       | rs62405954 | rs12664430 | 6:33272677 | 0.62 | 2 | 4.59E-09 | 6:33162754 | C/T | T | -5.86  | HLA-DPBI      | 0        |
| BAK1       | rs62405954 | rs12664430 | 6:33272677 | 0.62 | 2 | 2.19E-04 | 6:33533115 | C/T | T | 3.7    | SYNGAPI,ZBTB9 | 0.078    |
| BAK1       | rs62405954 | rs12664430 | 6:33272677 | 0.62 | 2 | 3.88E-08 | 6:33354286 | C/T | T | -5.5   | B3GALT4       | 0        |
| BAK1       | rs62405954 | rs12664430 | 6:33272677 | 0.62 | 2 | 1.02E-06 | 6:33375735 | C/T | T | 4.89   | TAPBP         | 3.02E-04 |
| BAK1       | rs62405954 | rs12664430 | 6:33272677 | 0.62 | 2 | 3.67E-04 | 6:33379629 | C/T | T | 3.56   | TAPBP         | 0.117    |
| BAK1       | rs62405954 | rs12664430 | 6:33272677 | 0.62 | 2 | 3.47E-03 | 6:33492459 | C/T | T | 2.92   | CUTA          | 0.496    |
| BAK1       | rs62405954 | rs3846855  | 6:33555877 | 0.47 | 0 | 1.48E-10 | 6:33492459 | G/A | A | 6.41   | CUTA          | 0        |
| BAK1       | rs62405954 | rs3846855  | 6:33555877 | 0.47 | 0 | 1.61E-05 | 6:33493262 | G/A | A | 4.31   | CUTA          | 0.007    |
| BAK1       | rs62405954 | rs5745568  | 6:33548394 | 0.46 | 2 | 1.89E-08 | 6:33492459 | G/T | T | 5.62   | CUTA          | 0        |
| BAK1       | rs62405954 | rs5745568  | 6:33548394 | 0.46 | 2 | 5.95E-05 | 6:33493262 | G/T | T | 4.01   | CUTA          | 0.025    |
| BAK1       | rs62405954 | rs9380365  | 6:33472317 | 0.42 | 2 | 5.06E-10 | 6:33354286 | T/A | A | -6.22  | B3GALT4       | 0        |
| BAK1       | rs62405954 | rs9380365  | 6:33472317 | 0.42 | 2 | 1.95E-07 | 6:33491946 | T/A | A | 5.2    | PHF1          | 6.31E-05 |
| BAK1       | rs62405954 | rs9380365  | 6:33472317 | 0.42 | 2 | 7.90E-06 | 6:33533115 | T/A | A | 4.47   | SYNGAPI,ZBTB9 | 0.004    |
| BAK1       | rs62405954 | rs9380365  | 6:33472317 | 0.42 | 2 | 7.41E-04 | 6:33493262 | T/A | A | 3.37   | CUTA          | 0.198    |
| BAK1       | rs62405954 | rs9380365  | 6:33472317 | 0.42 | 2 | 5.22E-17 | 6:33375735 | T/A | A | 8.38   | TAPBP         | 0        |
| BAK1       | rs62405954 | rs9380365  | 6:33472317 | 0.42 | 2 | 1.95E-07 | 6:33491946 | T/A | A | 5.2    | PHF1          | 6.31E-05 |
| BAK1       | rs62405954 | rs9380365  | 6:33472317 | 0.42 | 2 | 7.90E-06 | 6:33533115 | T/A | A | 4.47   | SYNGAPI,ZBTB9 | 0.004    |
| BAK1       | rs62405954 | rs9380365  | 6:33472317 | 0.42 | 2 | 7.41E-04 | 6:33493262 | T/A | A | 3.37   | CUTA          | 0.198    |
| BAK1       | rs62405954 | rs9380365  | 6:33472317 | 0.42 | 2 | 5.22E-17 | 6:33375735 | T/A | A | 8.38   | TAPBP         | 0        |

<sup>a</sup>Type: Imputed=0, genotyped=2

**Table S8.** Summary of findings from the functional annotation of the 5 novel SNPs and LD partners ( $r^2 \geq 0.5$ ) identified in HCHS/SOL

| Index SNP rsID | fSNP* rsID  | r <sup>2</sup> | fSNP p-value | fSNP Beta (SE) | Nearest Genes to fSNP | coded/alternate fSNP allele on (+) strand | fSNP CAF | fSNP oevar <sup>a</sup> | 1000 genomes phase III coded allele frequency |          |                   |             |            |      | Description of Findings                                                                                                                                                                                                                                                                                        |
|----------------|-------------|----------------|--------------|----------------|-----------------------|-------------------------------------------|----------|-------------------------|-----------------------------------------------|----------|-------------------|-------------|------------|------|----------------------------------------------------------------------------------------------------------------------------------------------------------------------------------------------------------------------------------------------------------------------------------------------------------------|
|                |             |                |              |                |                       |                                           |          |                         | African                                       | European | Ad Mixed American | South Asian | East Asian | All  |                                                                                                                                                                                                                                                                                                                |
| rs75140056     | rs29269     | 0.5            | 1.23E-06     | 0.131 (0.029)  | <i>GABBR1</i>         | C/T                                       | 0.77     | 1.0                     | 0.86                                          | 0.81     | 0.8               | 0.86        | 0.95       | 0.86 | rs29269 lies in a putative active <i>GABBR1</i> promoter in megakaryocytes, also overlaps several transcription factor ChIP-Seq peaks including TBP and ETS1 in K562 cells. Also overlaps RNA PolI ChIP-Seq Peak                                                                                               |
| rs62405954     | rs1002011   | 0.6            | 7.92E-06     | -0.186 (0.044) | <i>VPS52</i>          | G/A                                       | 0.89     | 1.0                     | 1.00                                          | 1.00     | 0.88              | 1.00        | 1.00       | 0.98 | Proxy SNP rs1002011 lies within a putative enhancer overlapping the 5' UTR of the <i>VPS52</i> gene. It also lies within a DNaseI hypersensitive peak and CFOS ChIP-Seq peak in HUVEC cells.                                                                                                                   |
| rs9470264      | rs80331350  | 0.8            | 2.66E-05     | -0.144 (0.034) | <i>PXT1</i>           | T/C                                       | 0.81     | 1.1                     | 0.87                                          | 0.99     | 0.78              | 0.99        | 0.87       | 0.9  | rs80331350 lies in a putative megakaryocyte enhancer in <i>PXT1</i> intron. The putative enhancer element overlaps GATA1 ChIP-Seq peak in peripheral blood-derived erythroblasts (PBDE) cells                                                                                                                  |
| rs9470264      | rs2273883   | 0.8            | 2.18E-05     | -0.170 (0.035) | <i>KCTD20</i>         | C/A                                       | 0.82     | 1.1                     | 0.99                                          | 0.99     | 0.79              | 0.99        | 0.87       | 0.94 | rs227883 ( $r^2=0.8$ ) lies within RUNX1 bound putative active <i>KCTD20</i> promoter in megakaryocytes. The putative promoter element overlaps ChIP-Seq peaks of promoter binding proteins RNA polymerase II, TBP, P300 and key megakaryocyte regulators including GATA1, GATA2, ETS1 and GABPA in K562 cells |
| rs9470264      | rs113553570 | 0.8            | 1.05E-06     | -0.168 (0.035) | <i>STK38</i>          | G/A                                       | 0.82     | 1.1                     | 0.89                                          | 0.99     | 0.78              | 0.99        | 0.87       | 0.91 | proxy SNP rs113553570 lies in a putative enhancer in <i>STK38</i> intron                                                                                                                                                                                                                                       |
| rs9470264      | rs2239541   | 0.8            | 1.11E-06     | -0.168 (0.035) | <i>STK38</i>          | G/A                                       | 0.82     | 1.1                     | 0.89                                          | 0.99     | 0.78              | 0.99        | 0.87       | 0.91 | proxy SNP rs2239541 ( $r^2=0.8$ ), which lies in a putative megakaryocyte enhancer in <i>STK38</i> intron                                                                                                                                                                                                      |
| rs9470264      | rs201891379 | 0.8            | 1.11E-06     | -0.172 (0.034) | <i>STK38</i>          | ACAAT<br>ACAAT<br>TAACT<br>AAAC/<br>A     | 0.81     | 1.1                     | 0.87                                          | 0.99     | 0.8               | 0.99        | 0.87       | 0.91 | proxy indel rs201891379 ( $r^2=0.8$ ), which lies in a putative promoter element upstream of <i>STK38</i> gene. The putative enhancer element overlaps ChIP-Seq peaks of GABP and IRF1 in K562 cells                                                                                                           |
| rs117672662    | rs117672662 | 1.0            | 4.88E-07     | 0.609 (0.055)  | <i>ACTN1</i>          | T/C                                       | 0.94     | 1.0                     | 1.00                                          | 1.00     | 0.93              | 1.00        | 1.00       | 0.99 | rs117672662 lies in a megakaryocyte-specific putative enhancer containing a RUNX1 consensus sequence and overlaps ChIP-Seq peaks of key megakaryocyte regulators ERG, FLI1 and RUNX1 in SKNO-1 cells (an acute myeloid leukemia cell line)                                                                     |
| rs144261491    | rs200572016 | 0.8            | 8.65E-29     | 0.393 (0.081)  | <i>MEF2C-ASI</i>      | TGA/T                                     | 0.97     | 0.9                     | 1.00                                          | 1.00     | 0.96              | 1.00        | 1.00       | 0.99 | indel rs200572016 lies in a putative megakaryocyte-specific enhancer in <i>MEF2C-ASI</i> intron; this enhancer element is DNase accessible in K562 cells and overlaps ChIP-Seq peaks of GATA2, TAL1 and P300 in these cells                                                                                    |

Abbreviations: fSNP = Predicted functional single nucleotide polymorphism; <sup>a</sup>= ratio of the variances of the observed and the estimated allele counts; CAF= Coded Allele Frequency

**Table S9.** Summary of *in silico* functional prediction algorithm results for significant variants and their LD partners

| Locus             | rsID               | Chr:Position | r <sup>2</sup> with HCHS/SOL lead SNP | CADD <sup>12</sup> C-Score | GWAVA <sup>13</sup> Score | RegulomeDB <sup>14</sup> Score | deltaSVM <sup>5</sup> Score for K562 cell line | Prioritized functional variant |
|-------------------|--------------------|--------------|---------------------------------------|----------------------------|---------------------------|--------------------------------|------------------------------------------------|--------------------------------|
| <i>ACTN1</i>      | rs117672662        | 14:69425467  | Lead                                  | 0.56                       | 0.32                      | 4                              | 9.84                                           | fSNP                           |
| <i>ACTN1</i>      | rs140754108        | 14:69407222  | 0.84                                  | 6.53                       | 0.26                      | 2b                             | 0.69                                           | -                              |
| <i>ACTN1</i>      | rs12431622         | 14:69415032  | 0.81                                  | 2.93                       | 0.32                      | 5                              | -1.45                                          | -                              |
| <i>GABBR1-MOG</i> | rs75140056 (indel) | 6:29608184   | Lead                                  | 7.06                       | NA                        | NA                             | NA                                             | -                              |
| <i>GABBR1-MOG</i> | rs3131857          | 6:29606794   | > 0.99                                | 1.38                       | 0.2                       | 6                              | -0.46                                          | -                              |
| <i>GABBR1-MOG</i> | rs4713235          | 6:29670478   | 0.60                                  | 4.29                       | 0.34                      | 2a                             | 1.13                                           | -                              |
| <i>GABBR1-MOG</i> | rs3131875          | 6:29666111   | 0.50                                  | 16.75                      | 0.09                      | 5                              | -2.03                                          | -                              |
| <i>GABBR1-MOG</i> | NA (indel)         | 6:29608870   | 0.50                                  | NA                         | NA                        | NA                             | NA                                             | -                              |
| <i>GABBR1-MOG</i> | rs29269            | 6:29617747   | 0.50                                  | 7.00                       | 0.71                      | 4                              | -4.58                                          | fSNP                           |
| <i>ETV7</i>       | rs9470264          | 6:36344980   | Lead                                  | 0.13                       | 0.14                      | 6                              | 2.04                                           | -                              |
| <i>ETV7</i>       | rs3778028          | 6:36349666   | 0.94                                  | 5.87                       | 0.37                      | 3a                             | -1.62                                          | -                              |
| <i>ETV7</i>       | rs1885206          | 6:36351095   | 0.93                                  | 3.35                       | 0.42                      | 2b                             | -0.37                                          | -                              |
| <i>ETV7</i>       | rs76676074         | 6:36361063   | 0.90                                  | 8.84                       | 0.21                      | 5                              | 0.35                                           | -                              |
| <i>ETV7</i>       | rs111654791        | 6:36376021   | 0.91                                  | 0.51                       | NA                        | No Data                        | -0.15                                          | -                              |
| <i>ETV7</i>       | rs80047437         | 6:36376369   | 0.91                                  | 4.63                       | 0.11                      | 6                              | 0.23                                           | -                              |
| <i>ETV7</i>       | rs112394821        | 6:36379855   | 0.91                                  | 0.03                       | 0.02                      | No Data                        | -1.88                                          | -                              |
| <i>ETV7</i>       | rs113849189        | 6:36383209   | 0.91                                  | 2.27                       | 0.03                      | No Data                        | -0.56                                          | -                              |
| <i>ETV7</i>       | rs79235676         | 6:36388019   | 0.91                                  | 8.38                       | 0.1                       | 6                              | -1.55                                          | -                              |
| <i>ETV7</i>       | rs74555455         | 6:36389418   | 0.91                                  | 3.58                       | 0.1                       | 6                              | -2.95                                          | -                              |
| <i>ETV7</i>       | rs80331350         | 6:36391236   | 0.91                                  | 13.53                      | 0.07                      | 2b                             | 1.07                                           | fSNP                           |
| <i>ETV7</i>       | rs150014990        | 6:36392403   | 0.90                                  | 0.72                       | 0.31                      | No Data                        | 1.29                                           | -                              |
| <i>ETV7</i>       | rs200860324        | 6:36403871   | 0.87                                  | 3.22                       | NA                        | 6                              | -3.31                                          | -                              |
| <i>ETV7</i>       | rs12526415         | 6:36403874   | 0.84                                  | 0.33                       | 0.11                      | 6                              | 1.75                                           | -                              |
| <i>ETV7</i>       | rs113585688        | 6:36405876   | 0.88                                  | 0.67                       | 0.29                      | No Data                        | -2.42                                          | -                              |
| <i>ETV7</i>       | rs4711451          | 6:36410308   | 0.84                                  | 2.71                       | 0.82                      | 4                              | 4.43                                           | -                              |
| <i>ETV7</i>       | rs4713976          | 6:36417410   | 0.84                                  | 11.93                      | 0.05                      | 5                              | 0.64                                           | -                              |
| <i>ETV7</i>       | rs4713977          | 6:36424664   | 0.81                                  | 2.54                       | 0.08                      | 5                              | 2.39                                           | -                              |
| <i>ETV7</i>       | rs79927326         | 6:36434643   | 0.81                                  | 0.81                       | 0.09                      | 5                              | 0.07                                           | -                              |
| <i>ETV7</i>       | rs2273882          | 6:36437713   | 0.81                                  | 0.96                       | 0.16                      | No Data                        | 3.11                                           | -                              |
| <i>ETV7</i>       | rs941974           | 6:36438385   | 0.81                                  | 0.96                       | 0.03                      | 6                              | -5.21                                          | -                              |
| <i>ETV7</i>       | rs79328581         | 6:36454464   | 0.81                                  | 5.45                       | 0.23                      | 5                              | -1.02                                          | -                              |
| <i>ETV7</i>       | rs75297867         | 6:36461335   | 0.81                                  | 0.01                       | 0.19                      | 5                              | 1.58                                           | -                              |
| <i>ETV7</i>       | rs4236051          | 6:36469821   | 0.81                                  | 0.97                       | 0.09                      | 5                              | -0.88                                          | -                              |
| <i>ETV7</i>       | rs2267930          | 6:36472788   | 0.81                                  | 4.91                       | 0.05                      | 5                              | -0.76                                          | -                              |
| <i>ETV7</i>       | rs75144098         | 6:36475146   | 0.81                                  | 9.50                       | 0.15                      | 5                              | 3.97                                           | -                              |
| <i>ETV7</i>       | rs111800900        | 6:36480859   | 0.81                                  | 7.86                       | 0.1                       | No Data                        | 2.51                                           | -                              |
| <i>ETV7</i>       | rs112845031        | 6:36486403   | 0.80                                  | 0.14                       | 0.08                      | No Data                        | 1.94                                           | -                              |
| <i>ETV7</i>       | rs75112107         | 6:36492839   | 0.80                                  | 4.25                       | 0.1                       | 5                              | 0.45                                           | -                              |
| <i>ETV7</i>       | rs113553570        | 6:36493878   | 0.80                                  | 0.17                       | 0.19                      | 6                              | 0.12                                           | fSNP                           |
| <i>ETV7</i>       | rs223954           | 6:36494053   | 0.80                                  | 15.13                      | 0.5                       | 5                              | -1.94                                          | fSNP                           |
| <i>ETV7</i>       | rs2273883          | 6:88133921   | 0.76                                  | 10.32                      | 0.94                      | 1f                             | -0.14                                          | fSNP                           |
| <i>MEF2C</i>      | rs144261491        | 5:88133921   | Lead                                  | 2.37                       | 0.18                      | NA                             | 0.71                                           | -                              |
| <i>MEF2C</i>      | rs151169192        | 5:88109756   | > 0.99                                | 5.25                       | 0.28                      | 4                              | -7.26                                          | -                              |
| <i>MEF2C</i>      | rs185717407        | 5:88171283   | 0.99                                  | 9.77                       | 0.4                       | 3a                             | -0.18                                          | -                              |
| <i>MEF2C</i>      | rs187320873        | 5:88172872   | 0.99                                  | 13.47                      | 0.61                      | 4                              | 3.84                                           | -                              |
| <i>MEF2C</i>      | rs184480102        | 5:87997100   | 0.75                                  | 3.49                       | 0.22                      | 6                              | 0.22                                           | -                              |
| <i>MEF2C</i>      | rs200572016        | 5:88220439   | 0.6                                   | 15.59                      | NA                        | 3a                             | -0.38                                          | fSNP                           |
| <i>BAK1</i>       | rs141400340        | 6:33577487   | Lead                                  | 4.07                       | 0.6                       | 2b                             | -0.84                                          | fSNP                           |
| <i>BAK1</i>       | rs62405954         | 6:33524820   | Lead                                  | 9.19                       | 0.30                      | 4                              | -3.11                                          | -                              |
| <i>BAK1</i>       | rs186384986        | 6:33467086   | 0.91                                  | 3.80                       | 0.01                      | 6                              | 0.19                                           | -                              |
| <i>BAK1</i>       | rs12526020         | 6:33467084   | 0.91                                  | 0.53                       | 0.01                      | 6                              | -0.28                                          | -                              |
| <i>BAK1</i>       | rs12664430         | 6:33272677   | 0.62                                  | 12.65                      | 0.45                      | No Data                        | 1.66                                           | -                              |
| <i>BAK1</i>       | rs186246149        | 6:33253646   | 0.59                                  | 4.12                       | 0.03                      | No Data                        | -1.62                                          | -                              |
| <i>BAK1</i>       | rs1002011          | 6:33218237   | 0.56                                  | 3.33                       | 0.94                      | 4                              | 0.055                                          | fSNP                           |
| <i>BAK1</i>       | rs144043427        | 6:33353011   | 0.53                                  | NA                         | NA                        | 6                              | NA                                             | -                              |
| <i>BAK1</i>       | rs5745564          | 6:33548696   | 0.50                                  | NA                         | NA                        | 5                              | NA                                             | -                              |
| <i>BAK1</i>       | rs75080135         | 6:33552707   | 0.48                                  | 0.79                       | 0.65                      | 5                              | -3.05                                          | -                              |

|             |            |            |      |       |      |         |       |   |
|-------------|------------|------------|------|-------|------|---------|-------|---|
| <i>BAK1</i> | rs3846855  | 6:33555877 | 0.47 | 2.28  | 0.13 | 6       | -1.88 | - |
| <i>BAK1</i> | rs5745568  | 6:33548394 | 0.46 | NA    | 0.86 | 1b      | -0.63 | - |
| <i>BAK1</i> | rs9357161  | 6:33549403 | 0.46 | 3.66  | 0.36 | No Data | 0.74  | - |
| <i>BAK1</i> | rs12206050 | 6:33564296 | 0.46 | 8.33  | 0.17 | 6       | -0.27 | - |
| <i>BAK1</i> | rs72882008 | 6:33572840 | 0.45 | 1.92  | 0.06 | 4       | 2.37  | - |
| <i>BAK1</i> | rs12214883 | 6:33513968 | 0.45 | 0.074 | 0.10 | 6       | -2.15 | - |
| <i>BAK1</i> | rs11968218 | 6:33518845 | 0.45 | 4.17  | 0.05 | 5       | -1.46 | - |
| <i>BAK1</i> | rs9380365  | 6:33472317 | 0.42 | 5.31  | 0.08 | 5       | 0     | - |
| <i>BAK1</i> | rs35144104 | 6:33463961 | 0.41 | 3.33  | 0.01 | 6       | -2.87 | - |

Abbreviation: fSNP=predicted functional single nucleotide polymorphism

**Table S10.** Results from cis-eQTL analysis of *ACTN1* rs117672662 in 1,457 Native Americans

| <b>Chr:Position</b> | <b>Illumina ID</b> | <b>Transcript</b> | <b>Beta<sup>a</sup><br/>(Standard<br/>Error)</b> | <b>P-value</b> | <b>SNP Number<sup>b</sup></b> |
|---------------------|--------------------|-------------------|--------------------------------------------------|----------------|-------------------------------|
| 14:66460685         | ILMN_1723607       | GPHN              | -0.02 (0.08)                                     | 8.4E-01        | 1                             |
| 14:66871825         | ILMN_1750689       | MPP5              | -0.04 (0.07)                                     | 6.0E-01        | 0                             |
| 14:66874720         | ILMN_1797310       | ATP6V1D           | 0.04 (0.09)                                      | 6.2E-01        | 0                             |
| 14:66922877         | ILMN_1739821       | EIF2S1            | 0.12 (0.08)                                      | 1.4E-01        | 0                             |
| 14:66923813         | ILMN_1811470       | PLEK2             | -0.01 (0.07)                                     | 8.8E-01        | 1                             |
| 14:67126397         | ILMN_1798395       | PIGH              | 0.10 (0.07)                                      | 1.8E-01        | 0                             |
| 14:67192886         | ILMN_1693136       | VTI1B             | -0.08 (0.07)                                     | 2.7E-01        | 1                             |
| 14:67213499         | ILMN_2128741       | RDH11             | -0.07 (0.08)                                     | 3.6E-01        | 0                             |
| 14:67213871         | ILMN_1768719       | RDH11             | -0.07 (0.07)                                     | 3.1E-01        | 0                             |
| 14:67283267         | ILMN_1798061       | ZFYVE26           | 0.13 (0.07)                                      | 6.9E-02        | 0                             |
| 14:68324290         | ILMN_1675448       | ZFP36L1           | -0.01 (0.07)                                     | 8.8E-01        | 0                             |
| 14:68411163         | ILMN_2232177       | ACTN1             | -0.05 (0.09)                                     | 5.6E-01        | 1                             |
| 14:68587437         | ILMN_1735402       | WDR22             | -0.04 (0.07)                                     | 5.7E-01        | 0                             |
| 14:68778515         | ILMN_1771689       | EXD2              | 0.05 (0.07)                                      | 5.2E-01        | 0                             |
| 14:68884396         | ILMN_1799903       | GALNTL1           | -0.07 (0.07)                                     | 3.0E-01        | 1                             |
| 14:68916937         | ILMN_1781795       | ERH               | 0.09 (0.07)                                      | 2.0E-01        | 0                             |
| 14:68996734         | ILMN_1756878       | SLC39A9           | 0.01 (0.08)                                      | 9.2E-01        | 0                             |
| 14:69251274         | ILMN_2226917       | KIAA0247          | 0.11 (0.07)                                      | 1.2E-01        | 1                             |
| 14:69307877         | ILMN_1761996       | SFRS5             | 0.16 (0.07)                                      | 1.8E-02        | 0                             |
| 14:69308064         | ILMN_2378868       | SFRS5             | 0.11 (0.07)                                      | 9.4E-02        | 1                             |
| 14:69862844         | ILMN_1706305       | COX16             | 0.02 (0.07)                                      | 7.7E-01        | 0                             |
| 14:69908650         | ILMN_1697793       | SYNJ2BP           | -0.03 (0.08)                                     | 6.9E-01        | 0                             |
| 14:70120755         | ILMN_1654543       | MED6              | 0.06 (0.09)                                      | 5.2E-01        | 0                             |
| 14:70360380         | ILMN_1900513       | AW449499          | -0.06 (0.07)                                     | 4.3E-01        | 0                             |
| 14:70443342         | ILMN_1882112       | BX101252          | -0.14 (0.07)                                     | 4.4E-02        | 1                             |
| 14:70646545         | ILMN_1740010       | PCNX              | -0.07 (0.07)                                     | 3.4E-01        | 0                             |
| 14:70934827         | ILMN_1715396       | SNORD56B          | -0.13 (0.07)                                     | 6.1E-02        | 0                             |

<sup>a</sup> = Standard Deviation per copy of the C allele<sup>b</sup> = Number of SNPs in probe

**Table S12.** Imputation scores for lead discovery variants and variants in high linkage disequilibrium ( $r^2>0.5$ )

| Locus name | rsID            | chromosome | position | Type <sup>a</sup> | $r^2$<br>with the lead | oevar | Info <sup>b</sup> |
|------------|-----------------|------------|----------|-------------------|------------------------|-------|-------------------|
| ZBTB9-BAK1 | rs62405954      | 6          | 33524820 | 2                 | 1                      | 1.06  | 1.00              |
| ZBTB9-BAK1 | rs186384986     | 6          | 33467086 | 0                 | 0.9                    | 1.03  | 0.97              |
| ZBTB9-BAK1 | rs12526020      | 6          | 33467084 | 0                 | 0.9                    | 1.03  | 0.97              |
| ZBTB9-BAK1 | rs12664430      | 6          | 33272677 | 2                 | 0.6                    | 1.04  | 1.00              |
| ZBTB9-BAK1 | rs186246149     | 6          | 33253646 | 0                 | 0.6                    | 1.07  | 0.99              |
| ZBTB9-BAK1 | rs147668544     | 6          | 33218237 | 0                 | 0.6                    | 0.98  | 0.90              |
| ZBTB9-BAK1 | rs144043427     | 6          | 33353011 | 0                 | 0.5                    | 0.99  | 0.97              |
| ZBTB9-BAK1 | rs5745564       | 6          | 33548696 | 0                 | 0.5                    | 1.05  | 1.00              |
| ZBTB9-BAK1 | rs75080135      | 6          | 33552707 | 0                 | 0.5                    | 1.04  | 0.99              |
| ZBTB9-BAK1 | rs3846855       | 6          | 33555877 | 0                 | 0.5                    | 1.04  | 0.99              |
| ZBTB9-BAK1 | rs5745568       | 6          | 33548394 | 2                 | 0.5                    | 1.04  | 1.00              |
| ZBTB9-BAK1 | rs9357161       | 6          | 33549403 | 0                 | 0.5                    | 1.03  | 1.00              |
| ZBTB9-BAK1 | rs12206050      | 6          | 33564296 | 0                 | 0.5                    | 1.04  | 1.00              |
| ZBTB9-BAK1 | rs72882008      | 6          | 33572840 | 0                 | 0.5                    | 1.01  | 0.98              |
| MEF2C-ASI  | rs144261491     | 5          | 88133921 | 0                 | 1                      | 0.87  | 0.84              |
| MEF2C-ASI  | rs151169192     | 5          | 88109756 | 0                 | 1                      | 0.87  | 0.83              |
| MEF2C-ASI  | rs185717407     | 5          | 88171283 | 0                 | 1                      | 0.87  | 0.84              |
| MEF2C-ASI  | rs187320873     | 5          | 88172872 | 0                 | 1                      | 0.87  | 0.84              |
| MEF2C-ASI  | rs184480102     | 5          | 87997100 | 0                 | 0.7                    | 0.71  | 0.68              |
| MEF2C-ASI  | rs200572016     | 5          | 88220439 | 0                 | 0.7                    | 0.89  | 0.86              |
| MEF2C-ASI  | rs184944447     | 5          | 87817728 | 0                 | 0.7                    | 0.84  | 0.80              |
| MEF2C-ASI  | rs188832904     | 5          | 87658662 | 0                 | 0.5                    | 0.82  | 0.79              |
| MEF2C-ASI  | rs142862331     | 5          | 88015336 | 0                 | 0.5                    | 0.53  | 0.52              |
| GABBR1-MOG | rs75140056      | 6          | 29608184 | 0                 | 1                      | 1.03  | 1.00              |
| GABBR1-MOG | rs114178179     | 6          | 29606794 | 0                 | 1                      | 1.02  | 0.99              |
| GABBR1-MOG | rs115621016     | 6          | 29670478 | 0                 | 0.6                    | 1.03  | 1.00              |
| GABBR1-MOG | rs3131875       | 6          | 29666111 | 2                 | 0.5                    | 1.03  | 1.00              |
| GABBR1-MOG | rs71946391      | 6          | 29608870 | 0                 | 0.5                    | 0.91  | 0.90              |
| GABBR1-MOG | rs29269         | 6          | 29617747 | 2                 | 0.5                    | 1.01  | 1.00              |
| ETV7       | rs9470264       | 6          | 36344980 | 0                 | 1                      | 1.06  | 0.96              |
| ETV7       | rs3778028       | 6          | 36349666 | 0                 | 1                      | 1.09  | 0.99              |
| ETV7       | rs1885206       | 6          | 36351095 | 0                 | 0.9                    | 1.09  | 0.99              |
| ETV7       | rs113585688     | 6          | 36405876 | 0                 | 0.8                    | 1.12  | 1.00              |
| ETV7       | rs76676074      | 6          | 36361063 | 0                 | 0.8                    | 1.12  | 0.99              |
| ETV7       | rs113849189     | 6          | 36383209 | 0                 | 0.8                    | 1.12  | 1.00              |
| ETV7       | rs16888788      | 6          | 36521517 | 0                 | 0.8                    | 1.13  | 0.99              |
| ETV7       | rs4711451       | 6          | 36410308 | 0                 | 0.8                    | 1.12  | 1.00              |
| ETV7       | rs2273883       | 6          | 36410801 | 0                 | 0.8                    | 1.12  | 1.00              |
| ETV7       | rs111654791     | 6          | 36376021 | 0                 | 0.8                    | 1.12  | 1.00              |
| ETV7       | rs80047437      | 6          | 36376369 | 0                 | 0.8                    | 1.12  | 1.00              |
| ETV7       | rs4713977       | 6          | 36424664 | 0                 | 0.8                    | 1.12  | 1.00              |
| ETV7       | rs4713976       | 6          | 36417410 | 0                 | 0.8                    | 1.12  | 1.00              |
| ETV7       | rs112394821     | 6          | 36379855 | 0                 | 0.8                    | 1.12  | 1.00              |
| ETV7       | rs79328581      | 6          | 36454464 | 0                 | 0.8                    | 1.12  | 1.00              |
| ETV7       | rs79235676      | 6          | 36388019 | 0                 | 0.8                    | 1.12  | 1.00              |
| ETV7       | chr6:36388436:1 | 6          | 36388436 | 0                 | 0.8                    | 1.12  | 1.00              |
| ETV7       | rs74555455      | 6          | 36389418 | 0                 | 0.8                    | 1.12  | 1.00              |
| ETV7       | rs80331350      | 6          | 36391236 | 0                 | 0.8                    | 1.12  | 1.00              |
| ETV7       | rs150014990     | 6          | 36392403 | 0                 | 0.8                    | 1.12  | 1.00              |
| ETV7       | rs113005836     | 6          | 36519616 | 0                 | 0.8                    | 1.12  | 1.00              |
| ETV7       | rs79927326      | 6          | 36434643 | 0                 | 0.8                    | 1.12  | 1.00              |
| ETV7       | rs2273882       | 6          | 36437713 | 2                 | 0.8                    | 1.12  | 1.00              |
| ETV7       | rs941974        | 6          | 36438385 | 0                 | 0.8                    | 1.12  | 1.00              |
| ETV7       | rs75297867      | 6          | 36461335 | 0                 | 0.8                    | 1.12  | 1.00              |
| ETV7       | rs4236051       | 6          | 36469821 | 2                 | 0.8                    | 1.12  | 1.00              |
| ETV7       | rs2267930       | 6          | 36472788 | 0                 | 0.8                    | 1.12  | 1.00              |
| ETV7       | rs75144098      | 6          | 36475146 | 0                 | 0.8                    | 1.12  | 1.00              |
| ETV7       | rs113412960     | 6          | 36500799 | 0                 | 0.8                    | 1.12  | 1.00              |
| ETV7       | rs111800900     | 6          | 36480859 | 0                 | 0.8                    | 1.12  | 1.00              |
| ETV7       | rs3819759       | 6          | 36496277 | 0                 | 0.8                    | 1.12  | 1.00              |
| ETV7       | rs111666164     | 6          | 36498423 | 0                 | 0.8                    | 1.12  | 1.00              |

|              |                 |    |          |   |     |      |      |
|--------------|-----------------|----|----------|---|-----|------|------|
| <i>ETV7</i>  | rs112740031     | 6  | 36498559 | 0 | 0.8 | 1.12 | 1.00 |
| <i>ETV7</i>  | rs75112107      | 6  | 36492839 | 0 | 0.8 | 1.12 | 1.00 |
| <i>ETV7</i>  | rs113553570     | 6  | 36493878 | 0 | 0.8 | 1.12 | 1.00 |
| <i>ETV7</i>  | rs2239541       | 6  | 36494053 | 0 | 0.8 | 1.12 | 1.00 |
| <i>ETV7</i>  | rs201891379     | 6  | 36515576 | 0 | 0.8 | 1.11 | 0.99 |
| <i>ETV7</i>  | rs12526415      | 6  | 36403874 | 2 | 0.8 | 1.11 | 1.00 |
| <i>ETV7</i>  | rs200860324     | 6  | 36403871 | 0 | 0.8 | 1.10 | 0.99 |
| <i>ETV7</i>  | rs116957783     | 6  | 36524594 | 0 | 0.8 | 1.11 | 0.99 |
| <i>ETV7</i>  | rs112845031     | 6  | 36486403 | 0 | 0.8 | 1.12 | 1.00 |
| <i>ETV7</i>  | rs78413663      | 6  | 36520101 | 0 | 0.7 | 1.11 | 1.00 |
| <i>ETV7</i>  | rs76976387      | 6  | 36521363 | 0 | 0.7 | 1.11 | 1.00 |
| <i>ETV7</i>  | rs202237535     | 6  | 36438384 | 0 | 0.7 | 1.01 | 0.90 |
| <i>ETV7</i>  | rs4140594       | 6  | 36564240 | 0 | 0.7 | 1.09 | 0.99 |
| <i>ETV7</i>  | rs3756907       | 6  | 36563129 | 0 | 0.7 | 1.09 | 0.99 |
| <i>ETV7</i>  | rs149171383     | 6  | 36517137 | 0 | 0.7 | 0.96 | 0.87 |
| <i>ETV7</i>  | rs7747978       | 6  | 36525321 | 0 | 0.7 | 1.06 | 0.97 |
| <i>ETV7</i>  | rs7740345       | 6  | 36344329 | 0 | 0.6 | 0.92 | 0.84 |
| <i>ETV7</i>  | rs4711454       | 6  | 36555422 | 0 | 0.6 | 1.08 | 1.00 |
| <i>ETV7</i>  | rs3756906       | 6  | 36563812 | 0 | 0.6 | 1.08 | 1.00 |
| <i>ETV7</i>  | rs76964964      | 6  | 36559290 | 0 | 0.6 | 1.08 | 1.00 |
| <i>ETV7</i>  | chr6:36576246:D | 6  | 36576246 | 0 | 0.6 | 1.08 | 1.00 |
| <i>ETV7</i>  | rs59108254      | 6  | 36576153 | 0 | 0.6 | 1.08 | 1.00 |
| <i>ETV7</i>  | rs60633269      | 6  | 36576414 | 2 | 0.6 | 1.08 | 1.00 |
| <i>ETV7</i>  | rs4713975       | 6  | 36395761 | 2 | 0.6 | 1.09 | 1.00 |
| <i>ETV7</i>  | rs7382195       | 6  | 36621000 | 0 | 0.6 | 1.12 | 0.99 |
| <i>ETV7</i>  | rs1998266       | 6  | 36358289 | 2 | 0.6 | 1.05 | 1.00 |
| <i>ETV7</i>  | rs111624705     | 6  | 36413945 | 0 | 0.6 | 1.09 | 1.00 |
| <i>ETV7</i>  | rs78373049      | 6  | 36421695 | 0 | 0.6 | 1.09 | 1.00 |
| <i>ETV7</i>  | rs76019396      | 6  | 36425227 | 0 | 0.6 | 1.09 | 1.00 |
| <i>ETV7</i>  | rs112542373     | 6  | 36416790 | 0 | 0.6 | 1.09 | 1.00 |
| <i>ETV7</i>  | rs4711455       | 6  | 36632458 | 0 | 0.6 | 1.13 | 1.00 |
| <i>ETV7</i>  | rs140429491     | 6  | 36422215 | 0 | 0.6 | 1.09 | 1.00 |
| <i>ETV7</i>  | rs4713998       | 6  | 36632610 | 2 | 0.6 | 1.13 | 1.00 |
| <i>ETV7</i>  | rs16888605      | 6  | 36433408 | 0 | 0.6 | 1.09 | 1.00 |
| <i>ETV7</i>  | rs77660021      | 6  | 36431499 | 0 | 0.6 | 1.09 | 1.00 |
| <i>ETV7</i>  | rs75776623      | 6  | 36477822 | 0 | 0.6 | 1.09 | 1.00 |
| <i>ETV7</i>  | rs41272166      | 6  | 36455838 | 2 | 0.6 | 1.09 | 1.00 |
| <i>ETV7</i>  | rs116413447     | 6  | 36479537 | 0 | 0.6 | 1.09 | 1.00 |
| <i>ETV7</i>  | rs4713978       | 6  | 36466787 | 2 | 0.6 | 1.09 | 1.00 |
| <i>ETV7</i>  | rs80032245      | 6  | 36492550 | 0 | 0.6 | 1.09 | 1.00 |
| <i>ETV7</i>  | rs77693176      | 6  | 36548128 | 0 | 0.6 | 1.07 | 0.99 |
| <i>ETV7</i>  | rs111747725     | 6  | 36509866 | 0 | 0.6 | 1.09 | 1.00 |
| <i>ETV7</i>  | rs12525802      | 6  | 36445288 | 0 | 0.6 | 1.08 | 1.00 |
| <i>ETV7</i>  | rs144398714     | 6  | 36346581 | 2 | 0.5 | 1.09 | 1.00 |
| <i>ETV7</i>  | rs138977532     | 6  | 36349802 | 2 | 0.5 | 1.09 | 1.00 |
| <i>ETV7</i>  | rs183032639     | 6  | 36517164 | 0 | 0.5 | 0.88 | 0.81 |
| <i>ETV7</i>  | rs7758498       | 6  | 36344213 | 0 | 0.5 | 0.87 | 0.81 |
| <i>ETV7</i>  | rs7776298       | 6  | 36548225 | 0 | 0.5 | 1.06 | 0.99 |
| <i>ETV7</i>  | rs78502475      | 6  | 36315211 | 0 | 0.5 | 1.07 | 0.93 |
| <i>ETV7</i>  | rs1744653       | 6  | 36397688 | 0 | 0.5 | 1.07 | 1.00 |
| <i>ETV7</i>  | rs7741260       | 6  | 36399120 | 2 | 0.5 | 1.07 | 1.00 |
| <i>ETV7</i>  | rs74693071      | 6  | 36298059 | 0 | 0.5 | 0.98 | 0.86 |
| <i>ACTN1</i> | rs117672662     | 14 | 69425467 | 0 | 1   | 1.01 | 0.98 |
| <i>ACTN1</i> | rs140754108     | 14 | 69407222 | 0 | 0.8 | 1.02 | 0.99 |
| <i>ACTN1</i> | rs12431622      | 14 | 69415032 | 0 | 0.8 | 1.01 | 0.98 |
| <i>ACTN1</i> | rs143493318     | 14 | 69369122 | 0 | 0.6 | 1.04 | 0.98 |
| <i>ACTN1</i> | rs3784133       | 14 | 69364953 | 2 | 0.5 | 1.06 | 1.00 |
| <i>ACTN1</i> | rs190190833     | 14 | 69350614 | 0 | 0.5 | 0.82 | 0.80 |
| <i>ACTN1</i> | rs76041256      | 14 | 69401213 | 0 | 0.5 | 1.01 | 1.00 |

<sup>1</sup>0=SNP was imputed,2= SNP was genotyped; <sup>a</sup>a statistical information metric from IMPUTE2

## References

1. Gieger, C. *et al.* New gene functions in megakaryopoiesis and platelet formation. *Nature* **480**, 201-8 (2011).
2. Li, J. *et al.* GWAS of blood cell traits identifies novel associated loci and epistatic interactions in Caucasian and African-American children. *Hum Mol Genet* **22**, 1457-64 (2013).
3. Shameer, K. *et al.* A genome- and phenome-wide association study to identify genetic variants influencing platelet count and volume and their pleiotropic effects. *Hum Genet* **133**, 95-109 (2014).
4. Soranzo, N. *et al.* A genome-wide meta-analysis identifies 22 loci associated with eight hematological parameters in the HaemGen consortium. *Nat Genet* **41**, 1182-90 (2009).
5. Qayyum, R. *et al.* A meta-analysis and genome-wide association study of platelet count and mean platelet volume in african americans. *PLoS Genet* **8**, e1002491 (2012).
6. Kamatani, Y. *et al.* Genome-wide association study of hematological and biochemical traits in a Japanese population. *Nat Genet* **42**, 210-5 (2010).
7. Martens, J.H. & Stunnenberg, H.G. BLUEPRINT: mapping human blood cell epigenomes. *Haematologica* **98**, 1487-9 (2013).
8. Encode Project Consortium. An integrated encyclopedia of DNA elements in the human genome. *Nature* **489**, 57-74 (2012).
9. Tijssen, M.R. *et al.* Genome-wide analysis of simultaneous GATA1/2, RUNX1, FLI1, and SCL binding in megakaryocytes identifies hematopoietic regulators. *Dev Cell* **20**, 597-609 (2011).
10. Martens, J.H. *et al.* ERG and FLI1 binding sites demarcate targets for aberrant epigenetic regulation by AML1-ETO in acute myeloid leukemia. *Blood* **120**, 4038-48 (2012).
11. Westra, H.J. *et al.* Systematic identification of trans eQTLs as putative drivers of known disease associations. *Nat Genet* **45**, 1238-43 (2013).
12. Kircher, M. *et al.* A general framework for estimating the relative pathogenicity of human genetic variants. *Nat Genet* **46**, 310-5 (2014).
13. Ritchie, G.R., Dunham, I., Zeggini, E. & Flicek, P. Functional annotation of noncoding sequence variants. *Nat Methods* **11**, 294-6 (2014).
14. Boyle, A.P. *et al.* Annotation of functional variation in personal genomes using RegulomeDB. *Genome Res* **22**, 1790-7 (2012).
15. Lee, D. *et al.* A method to predict the impact of regulatory variants from DNA sequence. *Nat Genet* **47**, 955-61 (2015).
